# Supplementary material
Source: bioRxiv or medRxiv preprint supplement (https://www.biorxiv.org/highwire/filestream/66049/field_highwire_adjunct_files/1/216754-10.pdf)
Supplement: Supplementary file [file 216754-10.pdf]

Supplementary Table 1: (a) Top driver genes regulating modules enriched in major pathways of cancer.  
 (b) Alterations of the top drivers across all cancer sites

(a)

**Angiogenesis (43 enriched modules)**

|                            | BLCA | BRCA | COADREAD | GBM | HNSC | KIRC | LAML | LUAD | LUSC | OV | UCEC | Total number of regulated modules |
|----------------------------|------|------|----------|-----|------|------|------|------|------|----|------|-----------------------------------|
| Number of enriched modules | 6    | 3    | 3        | 7   | 4    | 4    | 2    | 3    | 2    | 6  | 3    | 43                                |
| FSTL1                      | 2    | 1    | 0        | 0   | 0    | 0    | 0    | 1    | 1    | 1  | 2    | 8                                 |
| EMILIN1                    | 0    | 0    | 0        | 1   | 0    | 0    | 0    | 2    | 1    | 1  | 2    | 7                                 |
| BIRC3                      | 2    | 0    | 0        | 3   | 0    | 0    | 0    | 0    | 0    | 0  | 0    | 5                                 |
| SOCS3                      | 2    | 0    | 2        | 0   | 0    | 0    | 0    | 0    | 0    | 0  | 0    | 4                                 |
| CD248                      | 3    | 0    | 0        | 0   | 0    | 0    | 1    | 0    | 0    | 0  | 0    | 4                                 |
| PPP1R3B                    | 0    | 0    | 0        | 4   | 0    | 0    | 0    | 0    | 0    | 0  | 0    | 4                                 |
| NUAK1                      | 0    | 0    | 1        | 0   | 0    | 0    | 0    | 1    | 0    | 1  | 0    | 3                                 |
| SPARCL1                    | 1    | 0    | 0        | 0   | 0    | 0    | 0    | 2    | 0    | 0  | 0    | 3                                 |
| C1S                        | 2    | 0    | 0        | 1   | 0    | 0    | 0    | 0    | 0    | 0  | 0    | 3                                 |
| IL1B                       | 1    | 0    | 0        | 0   | 1    | 0    | 0    | 0    | 0    | 1  | 0    | 3                                 |
| OLFML1                     | 0    | 1    | 0        | 0   | 0    | 0    | 0    | 0    | 0    | 0  | 2    | 3                                 |
| ANGPTL2                    | 0    | 1    | 0        | 0   | 0    | 0    | 0    | 0    | 1    | 0  | 1    | 3                                 |
| CDO1                       | 0    | 0    | 1        | 0   | 0    | 0    | 0    | 1    | 0    | 0  | 0    | 2                                 |
| MSC                        | 2    | 0    | 0        | 0   | 0    | 0    | 0    | 0    | 0    | 0  | 0    | 2                                 |
| MME                        | 0    | 0    | 1        | 0   | 1    | 0    | 0    | 0    | 0    | 0  | 0    | 2                                 |
| SRPX2                      | 0    | 0    | 0        | 2   | 0    | 0    | 0    | 0    | 0    | 0  | 0    | 2                                 |
| CLIP3                      | 2    | 0    | 0        | 0   | 0    | 0    | 0    | 0    | 0    | 0  | 0    | 2                                 |
| WIPF1                      | 2    | 0    | 0        | 0   | 0    | 0    | 0    | 0    | 0    | 0  | 0    | 2                                 |
| VIM                        | 1    | 0    | 0        | 0   | 1    | 0    | 0    | 0    | 0    | 0  | 0    | 2                                 |
| RCN3                       | 2    | 0    | 0        | 0   | 0    | 0    | 0    | 0    | 0    | 0  | 0    | 2                                 |
| PDLIM2                     | 2    | 0    | 0        | 0   | 0    | 0    | 0    | 0    | 0    | 0  | 0    | 2                                 |
| SERPINB1                   | 1    | 0    | 0        | 0   | 0    | 0    | 0    | 0    | 0    | 1  | 0    | 2                                 |
| MCL1                       | 2    | 0    | 0        | 0   | 0    | 0    | 0    | 0    | 0    | 0  | 0    | 2                                 |
| TRIP13                     | 0    | 1    | 0        | 0   | 0    | 0    | 0    | 0    | 0    | 1  | 0    | 2                                 |
| CHEK1                      | 0    | 0    | 0        | 0   | 0    | 0    | 0    | 1    | 0    | 1  | 0    | 2                                 |
| MIDN                       | 1    | 0    | 0        | 0   | 1    | 0    | 0    | 0    | 0    | 0  | 0    | 2                                 |
| ANXA2                      | 0    | 0    | 0        | 2   | 0    | 0    | 0    | 0    | 0    | 0  | 0    | 2                                 |
| DTL                        | 0    | 0    | 0        | 2   | 0    | 0    | 0    | 0    | 0    | 0  | 0    | 2                                 |
| TUBA1C                     | 0    | 0    | 0        | 2   | 0    | 0    | 0    | 0    | 0    | 0  | 0    | 2                                 |
| GPR171                     | 0    | 1    | 0        | 0   | 0    | 0    | 0    | 0    | 1    | 0  | 0    | 2                                 |
| MMP14                      | 0    | 0    | 0        | 1   | 0    | 0    | 0    | 0    | 1    | 0  | 0    | 2                                 |
| INHBA                      | 0    | 0    | 0        | 0   | 2    | 0    | 0    | 0    | 0    | 0  | 0    | 2                                 |
| DDR2                       | 0    | 0    | 0        | 0   | 0    | 0    | 0    | 1    | 0    | 0  | 1    | 2                                 |
| CCLE5                      | 0    | 1    | 0        | 0   | 0    | 0    | 0    | 0    | 0    | 0  | 1    | 2                                 |
| PTPN7                      | 0    | 1    | 0        | 0   | 0    | 0    | 0    | 0    | 0    | 0  | 1    | 2                                 |
| PTPRCAP                    | 0    | 1    | 0        | 0   | 0    | 0    | 0    | 0    | 0    | 0  | 1    | 2                                 |
| RRM2                       | 0    | 1    | 0        | 0   | 0    | 0    | 0    | 1    | 0    | 0  | 0    | 2                                 |
| SNRK                       | 0    | 0    | 0        | 0   | 0    | 0    | 0    | 2    | 0    | 0  | 0    | 2                                 |
| KNTC1                      | 0    | 1    | 0        | 0   | 0    | 0    | 0    | 1    | 0    | 0  | 0    | 2                                 |
| ACTA2                      | 0    | 0    | 0        | 0   | 0    | 0    | 0    | 0    | 0    | 1  | 1    | 2                                 |
| PCOLCE                     | 0    | 1    | 0        | 0   | 0    | 0    | 0    | 0    | 0    | 1  | 0    | 2                                 |
| CTSK                       | 0    | 1    | 0        | 0   | 0    | 0    | 0    | 0    | 0    | 0  | 1    | 2                                 |
| CD247                      | 0    | 1    | 0        | 0   | 0    | 0    | 0    | 0    | 0    | 0  | 1    | 2                                 |
| CD27                       | 0    | 1    | 0        | 0   | 0    | 0    | 1    | 0    | 0    | 0  | 0    | 2                                 |
| GLT25D2                    | 0    | 0    | 0        | 0   | 0    | 0    | 2    | 0    | 0    | 0  | 0    | 2                                 |

**Hypoxia (44 enriched modules)**

|                            | BLCA | BRCA | COADREAD | GBM | HNSC | KIRC | LAML | LUAD | LUSC | OV | UCEC | Total number of regulated modules |
|----------------------------|------|------|----------|-----|------|------|------|------|------|----|------|-----------------------------------|
| Number of enriched modules | 4    | 2    | 3        | 8   | 3    | 2    | 2    | 7    | 1    | 10 | 2    | 44                                |
| BIRC3                      | 2    | 0    | 0        | 3   | 0    | 0    | 0    | 0    | 0    | 0  | 0    | 5                                 |
| SRPX2                      | 0    | 0    | 0        | 4   | 0    | 0    | 0    | 1    | 0    | 0  | 0    | 5                                 |
| PPP1R3B                    | 0    | 0    | 0        | 5   | 0    | 0    | 0    | 0    | 0    | 0  | 0    | 5                                 |
| CD248                      | 2    | 0    | 1        | 0   | 0    | 0    | 1    | 0    | 0    | 0  | 0    | 4                                 |
| CHEK1                      | 0    | 0    | 0        | 0   | 0    | 0    | 0    | 2    | 0    | 2  | 0    | 4                                 |
| IL1B                       | 1    | 0    | 0        | 0   | 1    | 0    | 0    | 0    | 0    | 2  | 0    | 4                                 |

|          |   |   |   |   |   |   |   |   |   |   |   |   |
|----------|---|---|---|---|---|---|---|---|---|---|---|---|
| WIPF1    | 2 | 0 | 0 | 0 | 0 | 0 | 0 | 0 | 0 | 0 | 1 | 3 |
| C1S      | 2 | 0 | 0 | 1 | 0 | 0 | 0 | 0 | 0 | 0 | 0 | 3 |
| MCL1     | 2 | 0 | 0 | 0 | 0 | 0 | 0 | 0 | 0 | 1 | 0 | 3 |
| SOCS3    | 2 | 0 | 1 | 0 | 0 | 0 | 0 | 0 | 0 | 0 | 0 | 3 |
| KNTC1    | 0 | 1 | 0 | 0 | 0 | 0 | 0 | 2 | 0 | 0 | 0 | 3 |
| ACTA2    | 0 | 0 | 0 | 0 | 0 | 0 | 0 | 0 | 0 | 3 | 0 | 3 |
| NUAK1    | 0 | 0 | 1 | 0 | 0 | 0 | 0 | 0 | 0 | 2 | 0 | 3 |
| MME      | 0 | 0 | 1 | 0 | 2 | 0 | 0 | 0 | 0 | 0 | 0 | 3 |
| DTL      | 0 | 0 | 0 | 2 | 0 | 0 | 0 | 0 | 0 | 1 | 0 | 3 |
| FAM83D   | 0 | 0 | 0 | 0 | 0 | 0 | 0 | 3 | 0 | 0 | 0 | 3 |
| NNMT     | 0 | 0 | 0 | 0 | 0 | 0 | 0 | 0 | 0 | 3 | 0 | 3 |
| EV12A    | 0 | 0 | 0 | 0 | 0 | 0 | 0 | 0 | 0 | 3 | 0 | 3 |
| ALPK2    | 0 | 0 | 0 | 0 | 0 | 0 | 0 | 0 | 0 | 3 | 0 | 3 |
| CD274    | 2 | 0 | 0 | 0 | 0 | 0 | 0 | 0 | 0 | 0 | 0 | 2 |
| BATF     | 0 | 0 | 0 | 2 | 0 | 0 | 0 | 0 | 0 | 0 | 0 | 2 |
| FSTL1    | 1 | 0 | 0 | 0 | 0 | 0 | 0 | 0 | 0 | 1 | 0 | 2 |
| SERPINB1 | 1 | 0 | 0 | 0 | 0 | 0 | 0 | 0 | 0 | 1 | 0 | 2 |
| TRIP13   | 0 | 1 | 0 | 0 | 0 | 0 | 0 | 0 | 0 | 1 | 0 | 2 |
| C16orf54 | 0 | 1 | 1 | 0 | 0 | 0 | 0 | 0 | 0 | 0 | 0 | 2 |
| RRM2     | 0 | 1 | 0 | 0 | 0 | 0 | 0 | 1 | 0 | 0 | 0 | 2 |
| GPR171   | 0 | 1 | 0 | 0 | 1 | 0 | 0 | 0 | 0 | 0 | 0 | 2 |
| TRIM22   | 0 | 0 | 1 | 1 | 0 | 0 | 0 | 0 | 0 | 0 | 0 | 2 |
| ATP10A   | 0 | 0 | 1 | 0 | 0 | 0 | 0 | 1 | 0 | 0 | 0 | 2 |
| PTPRC    | 0 | 1 | 0 | 0 | 0 | 0 | 0 | 0 | 0 | 0 | 1 | 2 |
| TGFB3    | 0 | 0 | 1 | 0 | 0 | 0 | 0 | 0 | 0 | 1 | 0 | 2 |
| SLA      | 0 | 0 | 0 | 1 | 0 | 0 | 0 | 0 | 0 | 0 | 1 | 2 |
| ANXA2    | 0 | 0 | 0 | 2 | 0 | 0 | 0 | 0 | 0 | 0 | 0 | 2 |
| RNF149   | 0 | 0 | 0 | 2 | 0 | 0 | 0 | 0 | 0 | 0 | 0 | 2 |
| KIAA0247 | 0 | 0 | 0 | 1 | 0 | 0 | 0 | 0 | 0 | 1 | 0 | 2 |
| TUBA1C   | 0 | 0 | 0 | 2 | 0 | 0 | 0 | 0 | 0 | 0 | 0 | 2 |
| ACTN1    | 0 | 0 | 0 | 1 | 0 | 0 | 0 | 1 | 0 | 0 | 0 | 2 |
| EGLN3    | 0 | 0 | 0 | 0 | 0 | 0 | 0 | 2 | 0 | 0 | 0 | 2 |
| ANGPT2   | 0 | 0 | 0 | 0 | 1 | 0 | 0 | 1 | 0 | 0 | 0 | 2 |
| GLT2SD2  | 0 | 0 | 0 | 0 | 0 | 0 | 2 | 0 | 0 | 0 | 0 | 2 |
| FAP      | 0 | 0 | 0 | 0 | 0 | 0 | 0 | 2 | 0 | 0 | 0 | 2 |
| MYBL2    | 0 | 0 | 0 | 0 | 0 | 0 | 0 | 2 | 0 | 0 | 0 | 2 |
| RHOH     | 0 | 0 | 0 | 0 | 0 | 0 | 0 | 0 | 0 | 1 | 1 | 2 |
| KCNN4    | 0 | 0 | 0 | 0 | 0 | 0 | 0 | 2 | 0 | 0 | 0 | 2 |
| LCP2     | 0 | 0 | 0 | 0 | 0 | 0 | 0 | 0 | 0 | 1 | 1 | 2 |
| RUNX2    | 0 | 0 | 0 | 0 | 0 | 0 | 0 | 0 | 0 | 2 | 0 | 2 |
| PTTG2    | 0 | 0 | 0 | 0 | 0 | 0 | 0 | 0 | 0 | 2 | 0 | 2 |
| GNPMB    | 0 | 0 | 0 | 0 | 0 | 0 | 0 | 0 | 0 | 2 | 0 | 2 |
| RARRES3  | 0 | 0 | 1 | 0 | 0 | 0 | 1 | 0 | 0 | 0 | 0 | 2 |
| ACAP1    | 0 | 0 | 0 | 1 | 0 | 0 | 0 | 0 | 0 | 0 | 0 | 2 |
| CD247    | 0 | 0 | 0 | 1 | 0 | 0 | 0 | 0 | 0 | 0 | 0 | 2 |
| GPR171   | 0 | 0 | 0 | 1 | 0 | 0 | 0 | 0 | 0 | 0 | 0 | 2 |
| AOAH     | 0 | 0 | 0 | 0 | 0 | 0 | 0 | 0 | 0 | 0 | 0 | 2 |
| IL2RG    | 0 | 0 | 0 | 0 | 0 | 0 | 0 | 0 | 0 | 0 | 0 | 2 |

### Epithelial Mesenchymal Transition (12 enriched modules)

|                            | BLCA | BRCA | COADREAD | GBM | HNSC | KIRC | LAML | LUAD | LUSC | OV | UCEC | Total number of regulated modules |
|----------------------------|------|------|----------|-----|------|------|------|------|------|----|------|-----------------------------------|
| Number of enriched modules | 1    | 0    | 2        | 1   | 2    | 2    | 0    | 1    | 0    | 3  | 0    | 12                                |
| TGFB3                      | 0    | 0    | 1        | 0   | 0    | 1    | 0    | 0    | 0    | 1  | 0    | 3                                 |
| NUAK1                      | 0    | 0    | 1        | 0   | 0    | 0    | 0    | 0    | 0    | 2  | 0    | 3                                 |
| CD248                      | 1    | 0    | 1        | 0   | 0    | 0    | 0    | 0    | 0    | 0  | 0    | 2                                 |
| FSTL1                      | 0    | 0    | 0        | 0   | 0    | 1    | 0    | 0    | 0    | 1  | 0    | 2                                 |
| MCL1                       | 1    | 0    | 0        | 0   | 0    | 0    | 0    | 0    | 0    | 1  | 0    | 2                                 |
| SOCS3                      | 1    | 0    | 1        | 0   | 0    | 0    | 0    | 0    | 0    | 0  | 0    | 2                                 |
| MIDN                       | 1    | 0    | 0        | 0   | 1    | 0    | 0    | 0    | 0    | 0  | 0    | 2                                 |
| PPP1R15A                   | 0    | 0    | 0        | 0   | 0    | 0    | 0    | 1    | 0    | 1  | 0    | 2                                 |
| NNMT                       | 0    | 0    | 0        | 0   | 0    | 0    | 0    | 0    | 0    | 2  | 0    | 2                                 |
| EV12A                      | 0    | 0    | 0        | 0   | 0    | 0    | 0    | 0    | 0    | 2  | 0    | 2                                 |
| ACTA2                      | 0    | 0    | 0        | 0   | 0    | 0    | 0    | 0    | 0    | 2  | 0    | 2                                 |
| RUNX2                      | 0    | 0    | 0        | 0   | 0    | 0    | 0    | 0    | 0    | 2  | 0    | 2                                 |
| ALPK2                      | 0    | 0    | 0        | 0   | 0    | 0    | 0    | 0    | 0    | 2  | 0    | 2                                 |

**Cell cycle (22 enriched modules)**

|                            | BLCA | BRCA | COADREAD | GBM | HNSC | KIRC | LAML | LUAD | LUSC | OV | UCEC | Total number of regulated modules |
|----------------------------|------|------|----------|-----|------|------|------|------|------|----|------|-----------------------------------|
| Number of enriched modules | 1    | 2    | 1        | 3   | 1    | 2    | 2    | 3    | 1    | 5  | 1    | 22                                |
| HIST1H2AE                  | 1    | 1    | 1        | 0   | 0    | 0    | 0    | 1    | 1    | 0  | 1    | 6                                 |
| CHEK1                      | 0    | 0    | 0        | 0   | 0    | 0    | 0    | 2    | 0    | 2  | 0    | 4                                 |
| HIST1H3G                   | 1    | 0    | 1        | 0   | 1    | 0    | 0    | 0    | 0    | 0  | 0    | 3                                 |
| KNTC1                      | 0    | 1    | 0        | 0   | 0    | 0    | 0    | 2    | 0    | 0  | 0    | 3                                 |
| HIST1H2BJ                  | 0    | 1    | 0        | 0   | 0    | 0    | 0    | 1    | 1    | 0  | 0    | 3                                 |
| HIST1H3H                   | 0    | 1    | 0        | 0   | 0    | 1    | 0    | 0    | 1    | 0  | 0    | 3                                 |
| DTL                        | 0    | 0    | 0        | 2   | 0    | 0    | 0    | 0    | 0    | 1  | 0    | 3                                 |
| NCAPG2                     | 0    | 0    | 0        | 0   | 0    | 1    | 1    | 0    | 0    | 1  | 0    | 3                                 |
| TPX2                       | 0    | 0    | 0        | 0   | 0    | 0    | 0    | 0    | 0    | 2  | 0    | 2                                 |
| TRIP13                     | 0    | 1    | 0        | 0   | 0    | 0    | 0    | 0    | 0    | 1  | 0    | 2                                 |
| RRM2                       | 0    | 1    | 0        | 0   | 0    | 0    | 0    | 1    | 0    | 0  | 0    | 2                                 |
| ENSA                       | 0    | 1    | 0        | 0   | 0    | 0    | 0    | 0    | 1    | 0  | 0    | 2                                 |
| HIST1H1D                   | 0    | 1    | 0        | 0   | 0    | 0    | 0    | 0    | 1    | 0  | 0    | 2                                 |
| HIST1H3D                   | 0    | 1    | 0        | 0   | 0    | 0    | 0    | 1    | 0    | 0  | 0    | 2                                 |
| HIVEP2                     | 0    | 0    | 0        | 2   | 0    | 0    | 0    | 0    | 0    | 0  | 0    | 2                                 |
| TUBA1C                     | 0    | 0    | 0        | 2   | 0    | 0    | 0    | 0    | 0    | 0  | 0    | 2                                 |
| HINT3                      | 0    | 0    | 0        | 1   | 0    | 1    | 0    | 0    | 0    | 0  | 0    | 2                                 |
| FIG4                       | 0    | 0    | 0        | 0   | 0    | 1    | 0    | 1    | 0    | 0  | 0    | 2                                 |
| MYBL2                      | 0    | 0    | 0        | 0   | 0    | 0    | 0    | 2    | 0    | 0  | 0    | 2                                 |
| EZH2                       | 0    | 0    | 0        | 0   | 0    | 0    | 0    | 0    | 0    | 2  | 0    | 2                                 |
| PTTG2                      | 0    | 0    | 0        | 0   | 0    | 0    | 0    | 0    | 0    | 2  | 0    | 2                                 |

**Immune response (100 enriched modules)**

|                            | BLCA | BRCA | COADREAD | GBM | HNSC | KIRC | LAML | LUAD | LUSC | OV | UCEC | Total number of regulated modules |
|----------------------------|------|------|----------|-----|------|------|------|------|------|----|------|-----------------------------------|
| Number of enriched modules | 11   | 8    | 8        | 9   | 12   | 7    | 7    | 9    | 9    | 11 | 9    | 100                               |
| CCL5                       | 0    | 2    | 0        | 0   | 2    | 1    | 0    | 2    | 2    | 3  | 2    | 14                                |
| TNFAIP8L2                  | 7    | 1    | 0        | 1   | 0    | 0    | 0    | 0    | 0    | 0  | 1    | 10                                |
| IL2RB                      | 6    | 0    | 0        | 0   | 0    | 0    | 1    | 3    | 0    | 0  | 0    | 10                                |
| GPR171                     | 0    | 2    | 0        | 1   | 4    | 0    | 0    | 0    | 2    | 1  | 0    | 10                                |
| BIRC3                      | 6    | 0    | 0        | 3   | 0    | 0    | 0    | 0    | 0    | 0  | 0    | 9                                 |
| OAS2                       | 1    | 1    | 0        | 1   | 1    | 0    | 1    | 1    | 1    | 1  | 1    | 9                                 |
| TRIM22                     | 0    | 0    | 3        | 1   | 1    | 0    | 0    | 1    | 1    | 2  | 0    | 9                                 |
| TBC1D10C                   | 0    | 0    | 0        | 1   | 7    | 1    | 0    | 0    | 0    | 0  | 0    | 9                                 |
| PPP1R16B                   | 3    | 1    | 0        | 0   | 0    | 0    | 0    | 2    | 2    | 0  | 0    | 8                                 |
| RARRES3                    | 2    | 0    | 0        | 2   | 1    | 0    | 0    | 1    | 0    | 1  | 1    | 8                                 |
| LAPTM5                     | 0    | 1    | 0        | 0   | 0    | 2    | 0    | 0    | 0    | 3  | 2    | 8                                 |
| DOK2                       | 0    | 1    | 4        | 0   | 0    | 0    | 0    | 0    | 0    | 2  | 1    | 8                                 |
| SLA                        | 0    | 0    | 3        | 3   | 0    | 0    | 0    | 0    | 0    | 0  | 2    | 8                                 |
| LCP1                       | 0    | 0    | 0        | 0   | 4    | 1    | 0    | 3    | 0    | 0  | 0    | 8                                 |
| GBP4                       | 0    | 0    | 0        | 0   | 4    | 0    | 0    | 2    | 1    | 1  | 0    | 8                                 |
| LCP2                       | 0    | 0    | 0        | 0   | 0    | 0    | 0    | 0    | 1    | 4  | 3    | 8                                 |
| PREX1                      | 0    | 0    | 0        | 0   | 7    | 0    | 0    | 0    | 0    | 0  | 0    | 7                                 |
| WIPF1                      | 5    | 0    | 0        | 0   | 0    | 0    | 0    | 0    | 0    | 0  | 1    | 6                                 |
| CTSS                       | 1    | 0    | 0        | 0   | 5    | 0    | 0    | 0    | 0    | 0  | 0    | 6                                 |
| PTPN7                      | 0    | 3    | 0        | 0   | 0    | 1    | 0    | 0    | 0    | 0  | 2    | 6                                 |
| GPR65                      | 0    | 1    | 0        | 0   | 0    | 1    | 0    | 4    | 0    | 0  | 0    | 6                                 |
| DAPP1                      | 0    | 0    | 1        | 2   | 0    | 2    | 0    | 0    | 0    | 0  | 1    | 6                                 |
| PLEK                       | 0    | 0    | 0        | 1   | 0    | 0    | 0    | 0    | 0    | 3  | 2    | 6                                 |
| PTPN22                     | 0    | 0    | 0        | 1   | 0    | 0    | 0    | 1    | 3    | 1  | 0    | 6                                 |
| NCF2                       | 0    | 0    | 0        | 0   | 0    | 1    | 0    | 0    | 1    | 3  | 1    | 6                                 |
| RCSD1                      | 0    | 0    | 0        | 0   | 0    | 0    | 0    | 3    | 3    | 0  | 0    | 6                                 |
| CIS                        | 3    | 0    | 0        | 1   | 1    | 0    | 0    | 0    | 0    | 0  | 0    | 5                                 |
| CD274                      | 4    | 0    | 0        | 0   | 0    | 0    | 0    | 1    | 0    | 0  | 0    | 5                                 |
| SOCS3                      | 2    | 0    | 2        | 0   | 0    | 0    | 0    | 0    | 0    | 0  | 1    | 5                                 |
| IL1B                       | 1    | 0    | 0        | 0   | 1    | 0    | 0    | 0    | 0    | 3  | 0    | 5                                 |
| ACAP1                      | 0    | 4    | 0        | 0   | 0    | 1    | 0    | 0    | 0    | 0  | 0    | 5                                 |
| PTPRCAP                    | 0    | 2    | 0        | 0   | 0    | 1    | 0    | 0    | 0    | 1  | 1    | 5                                 |
| SLAMF8                     | 0    | 2    | 0        | 0   | 0    | 1    | 0    | 0    | 0    | 0  | 2    | 5                                 |

|         |   |   |   |   |   |   |   |   |   |   |   |   |
|---------|---|---|---|---|---|---|---|---|---|---|---|---|
| NCKAP1L | 0 | 0 | 2 | 0 | 0 | 3 | 0 | 0 | 0 | 0 | 0 | 5 |
| CD6     | 0 | 0 | 0 | 1 | 4 | 0 | 0 | 0 | 0 | 0 | 0 | 5 |
| PTPRC   | 0 | 1 | 0 | 0 | 0 | 0 | 0 | 3 | 0 | 0 | 1 | 5 |
| FPR2    | 0 | 0 | 4 | 0 | 0 | 0 | 1 | 0 | 0 | 0 | 0 | 5 |
| PPP1R3B | 0 | 0 | 0 | 4 | 0 | 0 | 1 | 0 | 0 | 0 | 0 | 5 |
| SLCO2B1 | 0 | 0 | 0 | 0 | 0 | 1 | 0 | 0 | 0 | 3 | 1 | 5 |
| ITK     | 0 | 0 | 0 | 0 | 0 | 0 | 1 | 0 | 4 | 0 | 0 | 5 |
| CD5     | 0 | 0 | 0 | 0 | 0 | 0 | 0 | 2 | 2 | 1 | 0 | 5 |
| RHOH    | 0 | 0 | 0 | 0 | 0 | 0 | 0 | 1 | 0 | 3 | 1 | 5 |

#### Apoptosis (50 enriched modules)

|                            | BLCA | BRCA | COADREAD | GBM | HNSC | KIRC | LAML | LUAD | LUSC | OV | UCEC | Total number of regulated modules |
|----------------------------|------|------|----------|-----|------|------|------|------|------|----|------|-----------------------------------|
| Number of enriched modules | 3    | 3    | 3        | 11  | 4    | 5    | 1    | 3    | 3    | 9  | 5    | 50                                |
| OAS2                       | 1    | 1    | 0        | 1   | 2    | 0    | 0    | 1    | 1    | 1  | 1    | 9                                 |
| TRIM22                     | 0    | 0    | 1        | 1   | 2    | 0    | 0    | 0    | 1    | 1  | 0    | 6                                 |
| BIRC3                      | 2    | 0    | 0        | 3   | 0    | 0    | 0    | 0    | 0    | 0  | 0    | 5                                 |
| RARRES3                    | 0    | 0    | 0        | 2   | 0    | 0    | 0    | 1    | 0    | 1  | 0    | 4                                 |
| PARP9                      | 2    | 0    | 0        | 0   | 0    | 0    | 0    | 0    | 1    | 0  | 1    | 4                                 |
| IL1B                       | 1    | 0    | 0        | 0   | 1    | 0    | 0    | 0    | 0    | 2  | 0    | 4                                 |
| CCL5                       | 0    | 1    | 0        | 0   | 0    | 0    | 0    | 0    | 1    | 1  | 1    | 4                                 |
| PSMB8                      | 0    | 1    | 0        | 2   | 0    | 0    | 0    | 0    | 0    | 1  | 0    | 4                                 |
| BST2                       | 0    | 0    | 1        | 2   | 0    | 0    | 0    | 1    | 0    | 0  | 0    | 4                                 |
| SRPX2                      | 0    | 0    | 0        | 3   | 0    | 1    | 0    | 0    | 0    | 0  | 0    | 4                                 |
| CD274                      | 3    | 0    | 0        | 0   | 0    | 0    | 0    | 0    | 0    | 0  | 0    | 3                                 |
| IRF7                       | 1    | 0    | 0        | 1   | 1    | 0    | 0    | 0    | 0    | 0  | 0    | 3                                 |
| SP100                      | 0    | 0    | 0        | 0   | 1    | 0    | 0    | 1    | 1    | 0  | 0    | 3                                 |
| BATF2                      | 0    | 1    | 0        | 0   | 0    | 0    | 0    | 0    | 1    | 1  | 0    | 3                                 |
| ETV7                       | 0    | 1    | 0        | 0   | 1    | 0    | 0    | 0    | 0    | 0  | 1    | 3                                 |
| MX2                        | 0    | 1    | 0        | 0   | 1    | 0    | 0    | 0    | 0    | 1  | 0    | 3                                 |
| OAS1                       | 0    | 1    | 0        | 0   | 0    | 0    | 0    | 0    | 0    | 1  | 1    | 3                                 |
| PPP1R3B                    | 0    | 0    | 0        | 3   | 0    | 0    | 0    | 0    | 0    | 0  | 0    | 3                                 |
| IFI35                      | 0    | 0    | 0        | 1   | 0    | 0    | 0    | 0    | 0    | 1  | 1    | 3                                 |
| EPST11                     | 0    | 0    | 0        | 0   | 2    | 0    | 0    | 0    | 0    | 0  | 1    | 3                                 |
| XAF1                       | 0    | 0    | 0        | 0   | 0    | 0    | 0    | 0    | 1    | 1  | 1    | 3                                 |

#### Metastases (85 enriched modules)

|                            | BLCA | BRCA | COADREAD | GBM | HNSC | KIRC | LAML | LUAD | LUSC | OV | UCEC | Total number of regulated modules |
|----------------------------|------|------|----------|-----|------|------|------|------|------|----|------|-----------------------------------|
| Number of enriched modules | 11   | 7    | 6        | 7   | 9    | 6    | 2    | 7    | 10   | 14 | 6    | 85                                |
| FSTL1                      | 2    | 1    | 0        | 0   | 0    | 1    | 0    | 1    | 2    | 3  | 2    | 12                                |
| EMILIN1                    | 0    | 0    | 0        | 1   | 0    | 0    | 0    | 1    | 1    | 1  | 3    | 7                                 |
| GJB5                       | 1    | 0    | 1        | 0   | 0    | 0    | 0    | 1    | 2    | 0  | 1    | 6                                 |
| CD248                      | 3    | 0    | 1        | 0   | 0    | 0    | 1    | 0    | 0    | 0  | 0    | 5                                 |
| KRT16                      | 2    | 2    | 0        | 0   | 0    | 0    | 0    | 0    | 0    | 1  | 0    | 5                                 |
| OAS2                       | 1    | 1    | 0        | 1   | 0    | 0    | 0    | 0    | 0    | 1  | 1    | 5                                 |
| IL1RN                      | 1    | 0    | 0        | 0   | 0    | 0    | 0    | 0    | 4    | 0  | 0    | 5                                 |
| NUAK1                      | 0    | 0    | 1        | 0   | 0    | 0    | 0    | 1    | 0    | 3  | 0    | 5                                 |
| SDR9C7                     | 0    | 0    | 0        | 0   | 5    | 0    | 0    | 0    | 0    | 0  | 0    | 5                                 |
| BIRC3                      | 2    | 0    | 0        | 2   | 0    | 0    | 0    | 0    | 0    | 0  | 0    | 4                                 |
| IL1B                       | 1    | 0    | 0        | 0   | 1    | 0    | 0    | 0    | 0    | 2  | 0    | 4                                 |
| S100A14                    | 1    | 0    | 0        | 0   | 0    | 0    | 0    | 0    | 2    | 0  | 1    | 4                                 |
| OLFML1                     | 0    | 1    | 0        | 0   | 0    | 0    | 0    | 0    | 0    | 1  | 2    | 4                                 |
| TRIM29                     | 0    | 1    | 0        | 0   | 0    | 0    | 0    | 0    | 1    | 2  | 0    | 4                                 |
| NCCRP1                     | 0    | 1    | 0        | 0   | 3    | 0    | 0    | 0    | 0    | 0  | 0    | 4                                 |
| A2ML1                      | 0    | 1    | 0        | 0   | 0    | 0    | 0    | 0    | 2    | 0  | 1    | 4                                 |
| ACTA2                      | 0    | 0    | 0        | 0   | 0    | 0    | 0    | 0    | 0    | 3  | 1    | 4                                 |
| TGFB3                      | 0    | 0    | 1        | 0   | 0    | 1    | 0    | 0    | 0    | 2  | 0    | 4                                 |
| NNMT                       | 0    | 0    | 0        | 0   | 0    | 0    | 0    | 0    | 0    | 4  | 0    | 4                                 |
| RUNX2                      | 0    | 0    | 0        | 0   | 0    | 0    | 0    | 0    | 0    | 4  | 0    | 4                                 |
| CLIP3                      | 2    | 0    | 0        | 0   | 0    | 0    | 0    | 0    | 0    | 0  | 1    | 3                                 |
| KRT5                       | 1    | 0    | 0        | 0   | 0    | 0    | 0    | 0    | 2    | 0  | 0    | 3                                 |
| TMEM40                     | 1    | 0    | 0        | 0   | 0    | 0    | 0    | 0    | 1    | 1  | 0    | 3                                 |
| MCL1                       | 2    | 0    | 0        | 0   | 0    | 0    | 0    | 0    | 0    | 1  | 0    | 3                                 |

|         |   |   |   |   |   |   |   |   |   |   |   |   |
|---------|---|---|---|---|---|---|---|---|---|---|---|---|
| SOCS3   | 2 | 0 | 1 | 0 | 0 | 0 | 0 | 0 | 0 | 0 | 0 | 3 |
| GNAI5   | 0 | 0 | 0 | 0 | 0 | 0 | 0 | 1 | 2 | 0 | 0 | 3 |
| CHEK1   | 0 | 0 | 0 | 0 | 0 | 0 | 0 | 1 | 0 | 2 | 0 | 3 |
| S100A16 | 1 | 0 | 0 | 0 | 0 | 0 | 0 | 2 | 0 | 0 | 0 | 3 |
| PCOLCE  | 0 | 1 | 0 | 0 | 0 | 0 | 0 | 0 | 0 | 2 | 0 | 3 |
| ANGPTL2 | 0 | 1 | 0 | 0 | 0 | 0 | 0 | 0 | 1 | 0 | 1 | 3 |
| KCNJ11  | 0 | 1 | 0 | 0 | 0 | 1 | 0 | 1 | 0 | 0 | 0 | 3 |
| DDR2    | 0 | 0 | 0 | 0 | 0 | 0 | 0 | 0 | 1 | 1 | 1 | 3 |
| OAS1    | 0 | 1 | 0 | 0 | 0 | 0 | 0 | 0 | 0 | 1 | 1 | 3 |
| PSMB8   | 0 | 1 | 0 | 1 | 0 | 0 | 0 | 0 | 0 | 1 | 0 | 3 |
| SFN     | 0 | 0 | 1 | 0 | 0 | 1 | 0 | 0 | 0 | 0 | 1 | 3 |
| S100A9  | 0 | 0 | 0 | 0 | 0 | 0 | 0 | 0 | 3 | 0 | 0 | 3 |
| SRPX2   | 0 | 0 | 0 | 1 | 0 | 1 | 0 | 1 | 0 | 0 | 0 | 3 |
| PPP1R3B | 0 | 0 | 0 | 3 | 0 | 0 | 0 | 0 | 0 | 0 | 0 | 3 |
| DTL     | 0 | 0 | 0 | 2 | 0 | 0 | 0 | 0 | 0 | 1 | 0 | 3 |
| TMEM173 | 0 | 0 | 0 | 1 | 0 | 0 | 1 | 0 | 0 | 1 | 0 | 3 |
| MMP14   | 0 | 0 | 0 | 1 | 0 | 0 | 0 | 0 | 2 | 0 | 0 | 3 |
| IFI35   | 0 | 0 | 0 | 1 | 0 | 0 | 0 | 0 | 0 | 1 | 1 | 3 |
| GJB2    | 0 | 0 | 0 | 0 | 3 | 0 | 0 | 0 | 0 | 0 | 0 | 3 |
| DSG1    | 0 | 0 | 0 | 0 | 3 | 0 | 0 | 0 | 0 | 0 | 0 | 3 |
| GPC6    | 0 | 0 | 0 | 0 | 2 | 0 | 0 | 0 | 0 | 0 | 1 | 3 |
| KRT19   | 0 | 0 | 0 | 0 | 0 | 1 | 0 | 0 | 0 | 0 | 2 | 3 |
| PRKCDBP | 0 | 0 | 0 | 0 | 0 | 0 | 0 | 0 | 0 | 2 | 1 | 3 |
| FAP     | 0 | 0 | 0 | 0 | 0 | 0 | 0 | 3 | 0 | 0 | 0 | 3 |
| TNFSF4  | 0 | 0 | 0 | 0 | 0 | 0 | 0 | 2 | 1 | 0 | 0 | 3 |
| CLCA2   | 0 | 0 | 0 | 0 | 0 | 0 | 0 | 0 | 3 | 0 | 0 | 3 |
| STMN1   | 0 | 0 | 0 | 0 | 0 | 0 | 0 | 0 | 0 | 3 | 0 | 3 |
| ALPK2   | 0 | 0 | 0 | 0 | 0 | 0 | 0 | 0 | 0 | 3 | 0 | 3 |

#### Integrin (one enriched module)

|                            | BLCA | BRCA | COADREAD | GBM | HNSC | KIRC | LAML | LUAD | LUSC | OV | UCEC | Total number of regulated modules |
|----------------------------|------|------|----------|-----|------|------|------|------|------|----|------|-----------------------------------|
| Number of enriched modules | 0    | 0    | 0        | 1   | 0    | 0    | 0    | 0    | 0    | 0  | 0    | 1                                 |
| SVIL                       | 0    | 0    | 0        | 1   | 0    | 0    | 0    | 0    | 0    | 0  | 0    | 1                                 |
| COL5A2                     | 0    | 0    | 0        | 1   | 0    | 0    | 0    | 0    | 0    | 0  | 0    | 1                                 |
| ISLR                       | 0    | 0    | 0        | 1   | 0    | 0    | 0    | 0    | 0    | 0  | 0    | 1                                 |
| TMEM173                    | 0    | 0    | 0        | 1   | 0    | 0    | 0    | 0    | 0    | 0  | 0    | 1                                 |
| CTHRC1                     | 0    | 0    | 0        | 1   | 0    | 0    | 0    | 0    | 0    | 0  | 0    | 1                                 |
| PDLIM1                     | 0    | 0    | 0        | 1   | 0    | 0    | 0    | 0    | 0    | 0  | 0    | 1                                 |

#### Epidermal Growth Factor Receptor (34 enriched modules)

|                            | BLCA | BRCA | COADREAD | GBM | HNSC | KIRC | LAML | LUAD | LUSC | OV | UCEC | Total number of regulated modules |
|----------------------------|------|------|----------|-----|------|------|------|------|------|----|------|-----------------------------------|
| Number of enriched modules | 2    | 5    | 0        | 7   | 1    | 2    | 1    | 3    | 2    | 9  | 2    | 34                                |
| OAS2                       | 1    | 1    | 0        | 1   | 1    | 0    | 0    | 0    | 1    | 1  | 0    | 6                                 |
| HIST1H2AE                  | 1    | 1    | 0        | 0   | 0    | 0    | 0    | 1    | 1    | 0  | 1    | 5                                 |
| CHEK1                      | 0    | 0    | 0        | 0   | 0    | 0    | 0    | 2    | 0    | 2  | 0    | 4                                 |
| KNTC1                      | 0    | 2    | 0        | 0   | 0    | 0    | 0    | 2    | 0    | 0  | 0    | 4                                 |
| BIRC3                      | 1    | 0    | 0        | 2   | 0    | 0    | 0    | 0    | 0    | 0  | 0    | 3                                 |
| RARRES3                    | 0    | 0    | 0        | 1   | 0    | 0    | 0    | 0    | 0    | 2  | 0    | 3                                 |
| TRIP13                     | 0    | 2    | 0        | 0   | 0    | 0    | 0    | 0    | 0    | 1  | 0    | 3                                 |
| IRF7                       | 1    | 0    | 0        | 1   | 1    | 0    | 0    | 0    | 0    | 0  | 0    | 3                                 |
| HIST1H2BJ                  | 0    | 1    | 0        | 0   | 0    | 0    | 0    | 1    | 1    | 0  | 0    | 3                                 |
| HIST1H3H                   | 0    | 1    | 0        | 0   | 0    | 1    | 0    | 0    | 1    | 0  | 0    | 3                                 |
| TRIM22                     | 0    | 0    | 0        | 0   | 1    | 0    | 0    | 0    | 1    | 1  | 0    | 3                                 |
| BATF2                      | 0    | 1    | 0        | 0   | 0    | 0    | 0    | 0    | 1    | 1  | 0    | 3                                 |
| MX2                        | 0    | 1    | 0        | 0   | 1    | 0    | 0    | 0    | 0    | 1  | 0    | 3                                 |
| PSMB8                      | 0    | 1    | 0        | 1   | 0    | 0    | 0    | 0    | 0    | 1  | 0    | 3                                 |
| PPP1R3B                    | 0    | 0    | 0        | 3   | 0    | 0    | 0    | 0    | 0    | 0  | 0    | 3                                 |
| DTL                        | 0    | 0    | 0        | 2   | 0    | 0    | 0    | 0    | 0    | 1  | 0    | 3                                 |
| NCAPG2                     | 0    | 0    | 0        | 0   | 0    | 1    | 1    | 0    | 0    | 1  | 0    | 3                                 |
| NNMT                       | 0    | 0    | 0        | 0   | 0    | 0    | 0    | 0    | 0    | 3  | 0    | 3                                 |
| SP110                      | 1    | 0    | 0        | 0   | 1    | 0    | 0    | 0    | 0    | 0  | 0    | 2                                 |
| PARP9                      | 1    | 0    | 0        | 0   | 0    | 0    | 0    | 0    | 1    | 0  | 0    | 2                                 |

|          |   |   |   |   |   |   |   |   |   |   |   |   |
|----------|---|---|---|---|---|---|---|---|---|---|---|---|
| TPX2     | 0 | 0 | 0 | 0 | 0 | 0 | 0 | 0 | 0 | 2 | 0 | 2 |
| SP100    | 0 | 0 | 0 | 0 | 1 | 0 | 0 | 0 | 1 | 0 | 0 | 2 |
| CDT1     | 0 | 2 | 0 | 0 | 0 | 0 | 0 | 0 | 0 | 0 | 0 | 2 |
| FANCA    | 0 | 2 | 0 | 0 | 0 | 0 | 0 | 0 | 0 | 0 | 0 | 2 |
| CCL5     | 0 | 0 | 0 | 0 | 0 | 0 | 0 | 0 | 1 | 1 | 0 | 2 |
| CDC7     | 0 | 2 | 0 | 0 | 0 | 0 | 0 | 0 | 0 | 0 | 0 | 2 |
| RRM2     | 0 | 1 | 0 | 0 | 0 | 0 | 0 | 1 | 0 | 0 | 0 | 2 |
| SP140    | 0 | 1 | 0 | 0 | 0 | 1 | 0 | 0 | 0 | 0 | 0 | 2 |
| ENSA     | 0 | 1 | 0 | 0 | 0 | 0 | 0 | 0 | 1 | 0 | 0 | 2 |
| HIST1H1D | 0 | 1 | 0 | 0 | 0 | 0 | 0 | 0 | 1 | 0 | 0 | 2 |
| HIST1H3D | 0 | 1 | 0 | 0 | 0 | 0 | 0 | 1 | 0 | 0 | 0 | 2 |
| PSRC1    | 0 | 1 | 0 | 0 | 0 | 0 | 1 | 0 | 0 | 0 | 0 | 2 |
| OAS1     | 0 | 1 | 0 | 0 | 0 | 0 | 0 | 0 | 0 | 1 | 0 | 2 |
| SRPX2    | 0 | 0 | 0 | 2 | 0 | 0 | 0 | 0 | 0 | 0 | 0 | 2 |
| ANXA2    | 0 | 0 | 0 | 2 | 0 | 0 | 0 | 0 | 0 | 0 | 0 | 2 |
| HIVEP2   | 0 | 0 | 0 | 2 | 0 | 0 | 0 | 0 | 0 | 0 | 0 | 2 |
| KIAA0247 | 0 | 0 | 0 | 0 | 0 | 0 | 0 | 0 | 0 | 2 | 0 | 2 |
| TUBA1C   | 0 | 0 | 0 | 2 | 0 | 0 | 0 | 0 | 0 | 0 | 0 | 2 |
| HINT3    | 0 | 0 | 0 | 1 | 0 | 1 | 0 | 0 | 0 | 0 | 0 | 2 |
| IFI35    | 0 | 0 | 0 | 1 | 0 | 0 | 0 | 0 | 0 | 1 | 0 | 2 |
| TMEM71   | 0 | 0 | 0 | 0 | 0 | 0 | 0 | 0 | 0 | 2 | 0 | 2 |
| CH13L1   | 0 | 0 | 0 | 1 | 0 | 0 | 0 | 0 | 0 | 1 | 0 | 2 |
| XAF1     | 0 | 0 | 0 | 0 | 0 | 0 | 0 | 0 | 1 | 1 | 0 | 2 |
| FIG4     | 0 | 0 | 0 | 0 | 0 | 1 | 0 | 1 | 0 | 0 | 0 | 2 |
| MYBL2    | 0 | 0 | 0 | 0 | 0 | 0 | 0 | 2 | 0 | 0 | 0 | 2 |
| STMN1    | 0 | 0 | 0 | 0 | 0 | 0 | 0 | 0 | 0 | 2 | 0 | 2 |
| TMEM140  | 0 | 0 | 0 | 0 | 0 | 0 | 0 | 0 | 0 | 2 | 0 | 2 |
| EZH2     | 0 | 0 | 0 | 0 | 0 | 0 | 0 | 0 | 0 | 2 | 0 | 2 |
| PTTG2    | 0 | 0 | 0 | 0 | 0 | 0 | 0 | 0 | 0 | 2 | 0 | 2 |

(b)

|       | BLCA            | BRCA             | COADREAD         | GBM | HNSC             | KIRC             | LAML | LUAD                      | LUSC                      | OV                        | UCEC                      |
|-------|-----------------|------------------|------------------|-----|------------------|------------------|------|---------------------------|---------------------------|---------------------------|---------------------------|
| CHEK1 | Amplified       |                  | Amplified        |     |                  |                  |      | Amplified                 |                           | Amplified                 |                           |
| FSTL1 | Hypo-methylated | Hyper-methylated |                  |     |                  | Hyper-methylated |      | Hyper-methylated          | Hyper-methylated          | Hypo and hyper-methylated | Hypo and hyper-methylated |
| TGFB3 |                 |                  | Hyper-methylated |     |                  | Hyper-methylated |      |                           |                           | Hyper-methylated          |                           |
| NUAK1 |                 |                  | Hyper-methylated |     | Hypo-methylated  |                  |      | Hypo and hyper-methylated | Hypo and hyper-methylated | Hypo-methylated           | Hypo and hyper-methylated |
| CCL5  |                 | Hyper-methylated |                  |     | Hyper-methylated | Hyper-methylated |      | Hyper-methylated          | Hyper-methylated          | Hyper-methylated          | Hyper-methylated          |

Supplementary Table 2: Driver genes ranked according to the number of regulated modules across all cancers

|           | BLCA | BRCA | COADREAD | GBM | HNSC | KIRC | LAML | LUAD | LUSC | OV | UCEC | Total number of regulated modules |
|-----------|------|------|----------|-----|------|------|------|------|------|----|------|-----------------------------------|
| FSTL1     | 4    | 6    | 0        | 0   | 0    | 1    | 0    | 5    | 3    | 8  | 4    | 31                                |
| IFFO1     | 8    | 2    | 10       | 0   | 0    | 0    | 0    | 2    | 4    | 0  | 3    | 29                                |
| MLPH      | 0    | 14   | 6        | 0   | 1    | 0    | 0    | 0    | 4    | 0  | 3    | 28                                |
| SPARCL1   | 8    | 0    | 0        | 0   | 4    | 2    | 0    | 10   | 2    | 0  | 0    | 26                                |
| CLIP3     | 12   | 0    | 0        | 0   | 0    | 0    | 0    | 3    | 0    | 2  | 7    | 24                                |
| MFAP4     | 0    | 10   | 0        | 0   | 0    | 0    | 0    | 0    | 8    | 2  | 4    | 24                                |
| BEND5     | 5    | 0    | 0        | 0   | 9    | 0    | 0    | 5    | 3    | 0  | 0    | 22                                |
| NUAK1     | 0    | 0    | 6        | 0   | 1    | 0    | 0    | 4    | 1    | 5  | 4    | 21                                |
| CAPS      | 4    | 0    | 1        | 2   | 2    | 2    | 0    | 3    | 2    | 2  | 3    | 21                                |
| PPP1R16B  | 8    | 4    | 0        | 0   | 0    | 0    | 0    | 3    | 4    | 0  | 2    | 21                                |
| OLFML1    | 0    | 6    | 0        | 1   | 0    | 4    | 0    | 0    | 0    | 4  | 6    | 21                                |
| SLA       | 0    | 0    | 7        | 11  | 0    | 0    | 0    | 0    | 0    | 0  | 2    | 20                                |
| DDR2      | 0    | 3    | 0        | 0   | 4    | 3    | 0    | 2    | 2    | 2  | 4    | 20                                |
| CDO1      | 1    | 1    | 7        | 0   | 2    | 0    | 0    | 6    | 0    | 2  | 0    | 19                                |
| C1S       | 8    | 2    | 0        | 4   | 1    | 4    | 0    | 0    | 0    | 0  | 0    | 19                                |
| EFEMP2    | 0    | 4    | 0        | 3   | 0    | 0    | 3    | 4    | 3    | 0  | 2    | 19                                |
| EMILIN1   | 0    | 0    | 0        | 1   | 0    | 0    | 0    | 6    | 5    | 2  | 5    | 19                                |
| OSMR      | 8    | 0    | 9        | 0   | 0    | 0    | 0    | 0    | 0    | 0  | 0    | 17                                |
| SULT1C4   | 6    | 0    | 0        | 0   | 0    | 1    | 1    | 0    | 5    | 4  | 0    | 17                                |
| RARRES3   | 2    | 1    | 0        | 3   | 1    | 0    | 0    | 1    | 0    | 7  | 2    | 17                                |
| CCL5      | 0    | 3    | 0        | 0   | 2    | 1    | 0    | 3    | 3    | 3  | 2    | 17                                |
| TBC1D10C  | 0    | 0    | 0        | 1   | 11   | 1    | 2    | 0    | 0    | 2  | 0    | 17                                |
| SMO       | 0    | 1    | 6        | 0   | 0    | 0    | 0    | 1    | 1    | 6  | 1    | 16                                |
| TRIM22    | 0    | 1    | 4        | 2   | 2    | 0    | 0    | 2    | 1    | 3  | 1    | 16                                |
| GPX2      | 3    | 2    | 1        | 0   | 4    | 0    | 0    | 1    | 4    | 0  | 1    | 16                                |
| IGF1      | 13   | 0    | 0        | 0   | 0    | 0    | 0    | 2    | 0    | 0  | 1    | 16                                |
| RIN1      | 2    | 0    | 0        | 4   | 0    | 2    | 2    | 0    | 4    | 0  | 2    | 16                                |
| BCL2      | 0    | 5    | 0        | 0   | 9    | 0    | 0    | 0    | 2    | 0  | 0    | 16                                |
| ACTA2     | 0    | 2    | 0        | 0   | 0    | 0    | 0    | 0    | 3    | 7  | 4    | 16                                |
| ATP10A    | 0    | 1    | 9        | 0   | 0    | 0    | 2    | 3    | 0    | 0  | 0    | 15                                |
| TGFB3     | 0    | 0    | 9        | 0   | 0    | 4    | 0    | 0    | 0    | 2  | 0    | 15                                |
| DOCK2     | 0    | 1    | 8        | 0   | 0    | 0    | 0    | 0    | 6    | 0  | 0    | 15                                |
| METTL7A   | 0    | 0    | 7        | 0   | 3    | 0    | 0    | 5    | 0    | 0  | 0    | 15                                |
| LTBP3     | 0    | 0    | 5        | 0   | 3    | 0    | 6    | 0    | 0    | 0  | 1    | 15                                |
| CHST10    | 2    | 0    | 4        | 0   | 3    | 2    | 0    | 1    | 3    | 0  | 0    | 15                                |
| DAPP1     | 0    | 0    | 3        | 3   | 0    | 2    | 2    | 2    | 1    | 1  | 1    | 15                                |
| HSPB6     | 0    | 6    | 2        | 0   | 0    | 0    | 0    | 0    | 6    | 0  | 1    | 15                                |
| OLFM1     | 10   | 1    | 2        | 0   | 0    | 0    | 0    | 2    | 0    | 0  | 0    | 15                                |
| SRPX2     | 0    | 0    | 1        | 7   | 0    | 5    | 0    | 2    | 0    | 0  | 0    | 15                                |
| WIPF1     | 10   | 1    | 0        | 0   | 0    | 0    | 0    | 0    | 0    | 0  | 4    | 15                                |
| VIM       | 6    | 3    | 0        | 0   | 5    | 0    | 1    | 0    | 0    | 0  | 0    | 15                                |
| IL2RB     | 6    | 0    | 0        | 0   | 0    | 0    | 5    | 4    | 0    | 0  | 0    | 15                                |
| RECK      | 6    | 0    | 0        | 0   | 5    | 0    | 0    | 0    | 4    | 0  | 0    | 15                                |
| MYEF2     | 5    | 0    | 0        | 0   | 1    | 0    | 2    | 0    | 7    | 0  | 0    | 15                                |
| SELENBP1  | 0    | 0    | 0        | 0   | 0    | 0    | 2    | 7    | 4    | 0  | 2    | 15                                |
| LDOC1     | 0    | 0    | 12       | 0   | 0    | 0    | 2    | 0    | 0    | 0  | 0    | 14                                |
| GYPC      | 0    | 1    | 10       | 0   | 0    | 0    | 0    | 0    | 0    | 0  | 3    | 14                                |
| GBP4      | 0    | 0    | 0        | 0   | 6    | 0    | 3    | 2    | 2    | 1  | 0    | 14                                |
| SPATA18   | 0    | 0    | 0        | 0   | 0    | 0    | 0    | 6    | 0    | 4  | 4    | 14                                |
| CHST3     | 2    | 7    | 4        | 0   | 0    | 0    | 0    | 0    | 0    | 0  | 0    | 13                                |
| CD248     | 6    | 0    | 4        | 0   | 0    | 0    | 3    | 0    | 0    | 0  | 0    | 13                                |
| KIAA1324  | 0    | 0    | 3        | 0   | 0    | 0    | 0    | 0    | 2    | 3  | 5    | 13                                |
| PREX1     | 0    | 1    | 0        | 0   | 12   | 0    | 0    | 0    | 0    | 0  | 0    | 13                                |
| PKIA      | 0    | 1    | 0        | 0   | 2    | 1    | 2    | 0    | 0    | 5  | 2    | 13                                |
| CTSZ      | 0    | 0    | 0        | 3   | 0    | 2    | 8    | 0    | 0    | 0  | 0    | 13                                |
| DOK2      | 0    | 1    | 7        | 0   | 0    | 0    | 0    | 0    | 0    | 3  | 1    | 12                                |
| SOCS3     | 2    | 0    | 6        | 0   | 0    | 0    | 0    | 0    | 0    | 0  | 4    | 12                                |
| TUBGCP6   | 1    | 0    | 4        | 2   | 0    | 0    | 0    | 2    | 2    | 1  | 0    | 12                                |
| SFN       | 0    | 0    | 4        | 0   | 0    | 1    | 0    | 0    | 0    | 4  | 3    | 12                                |
| PKLR      | 0    | 0    | 2        | 0   | 0    | 4    | 6    | 0    | 0    | 0  | 0    | 12                                |
| BIRC3     | 7    | 0    | 0        | 5   | 0    | 0    | 0    | 0    | 0    | 0  | 0    | 12                                |
| TNFAIP8L2 | 7    | 1    | 0        | 3   | 0    | 0    | 0    | 0    | 0    | 0  | 1    | 12                                |
| SV2A      | 1    | 0    | 0        | 0   | 2    | 0    | 0    | 6    | 0    | 0  | 3    | 12                                |
| BCL11A    | 0    | 7    | 0        | 4   | 0    | 0    | 0    | 0    | 1    | 0  | 0    | 12                                |
| SLC44A4   | 0    | 4    | 0        | 0   | 1    | 1    | 0    | 1    | 4    | 0  | 1    | 12                                |
| PTPRCAP   | 0    | 2    | 0        | 0   | 0    | 1    | 6    | 0    | 0    | 2  | 1    | 12                                |
| CYFIP2    | 0    | 0    | 0        | 5   | 0    | 0    | 0    | 0    | 7    | 0  | 0    | 12                                |
| TMEM173   | 0    | 0    | 0        | 2   | 0    | 1    | 1    | 2    | 2    | 4  | 0    | 12                                |
| FLRT2     | 0    | 0    | 8        | 0   | 3    | 0    | 0    | 0    | 0    | 0  | 0    | 11                                |
| TRIB2     | 0    | 0    | 7        | 4   | 0    | 0    | 0    | 0    | 0    | 0  | 0    | 11                                |
| PNMA1     | 5    | 0    | 4        | 2   | 0    | 0    | 0    | 0    | 0    | 0  | 0    | 11                                |
| GJB5      | 5    | 0    | 2        | 0   | 0    | 0    | 0    | 1    | 2    | 0  | 1    | 11                                |
| BCAS1     | 8    | 3    | 0        | 0   | 0    | 0    | 0    | 0    | 0    | 0  | 0    | 11                                |
| OAS2      | 1    | 1    | 0        | 1   | 2    | 0    | 2    | 1    | 1    | 1  | 1    | 11                                |
| CRISPLD1  | 1    | 0    | 0        | 0   | 2    | 0    | 0    | 0    | 1    | 5  | 2    | 11                                |
| CSTA      | 1    | 0    | 0        | 9   | 0    | 0    | 0    | 0    | 1    | 0  | 0    | 11                                |
| PCOLCE    | 0    | 7    | 0        | 0   | 0    | 0    | 0    | 0    | 0    | 4  | 0    | 11                                |
| VTCN1     | 0    | 3    | 0        | 0   | 0    | 0    | 0    | 0    | 1    | 5  | 2    | 11                                |
| GPR171    | 0    | 2    | 0        | 2   | 4    | 0    | 0    | 0    | 2    | 1  | 0    | 11                                |
| ATP8A2    | 0    | 0    | 0        | 7   | 0    | 0    | 0    | 0    | 2    | 2  | 0    | 11                                |
| TLR8      | 0    | 0    | 0        | 7   | 0    | 0    | 4    | 0    | 0    | 0  | 0    | 11                                |
| PLEK      | 0    | 0    | 0        | 5   | 0    | 0    | 0    | 0    | 0    | 4  | 2    | 11                                |

|           |   |   |   |   |    |   |   |   |   |   |   |    |
|-----------|---|---|---|---|----|---|---|---|---|---|---|----|
| CCDC89    | 0 | 0 | 0 | 2 | 0  | 1 | 0 | 3 | 1 | 1 | 3 | 11 |
| PTPRM     | 0 | 0 | 0 | 0 | 10 | 0 | 0 | 0 | 0 | 0 | 1 | 11 |
| LCP1      | 0 | 0 | 0 | 0 | 6  | 1 | 0 | 3 | 1 | 0 | 0 | 11 |
| MSI1      | 0 | 0 | 0 | 0 | 5  | 0 | 0 | 0 | 6 | 0 | 0 | 11 |
| SERPINF1  | 0 | 0 | 0 | 0 | 3  | 5 | 0 | 3 | 0 | 0 | 0 | 11 |
| CMTM3     | 0 | 0 | 7 | 0 | 0  | 1 | 0 | 0 | 1 | 0 | 1 | 10 |
| NCKAP1L   | 0 | 1 | 6 | 0 | 0  | 3 | 0 | 0 | 0 | 0 | 0 | 10 |
| LRRC2     | 0 | 0 | 3 | 0 | 0  | 2 | 0 | 0 | 0 | 0 | 5 | 10 |
| CTTNBP2   | 0 | 4 | 1 | 0 | 2  | 0 | 0 | 0 | 3 | 0 | 0 | 10 |
| DIXDC1    | 7 | 3 | 0 | 0 | 0  | 0 | 0 | 0 | 0 | 0 | 0 | 10 |
| DSE       | 6 | 0 | 0 | 0 | 0  | 0 | 0 | 0 | 4 | 0 | 0 | 10 |
| C14orf132 | 4 | 0 | 0 | 0 | 0  | 6 | 0 | 0 | 0 | 0 | 0 | 10 |
| CTSS      | 2 | 0 | 0 | 0 | 8  | 0 | 0 | 0 | 0 | 0 | 0 | 10 |
| TRIM29    | 0 | 4 | 0 | 0 | 0  | 0 | 0 | 0 | 1 | 5 | 0 | 10 |
| ARAP3     | 0 | 2 | 0 | 0 | 0  | 8 | 0 | 0 | 0 | 0 | 0 | 10 |
| TAGLN     | 0 | 2 | 0 | 0 | 0  | 5 | 0 | 0 | 0 | 1 | 2 | 10 |
| ELOVL4    | 0 | 1 | 0 | 0 | 0  | 0 | 0 | 2 | 0 | 0 | 7 | 10 |
| WNK2      | 0 | 1 | 0 | 0 | 8  | 0 | 0 | 0 | 1 | 0 | 0 | 10 |
| BASP1     | 0 | 0 | 0 | 6 | 1  | 0 | 2 | 0 | 0 | 0 | 1 | 10 |
| KIAA0247  | 0 | 0 | 0 | 3 | 0  | 0 | 0 | 1 | 0 | 6 | 0 | 10 |
| TCF4      | 0 | 0 | 0 | 0 | 6  | 0 | 0 | 0 | 0 | 0 | 4 | 10 |
| ADD2      | 0 | 0 | 0 | 0 | 1  | 0 | 0 | 0 | 8 | 0 | 1 | 10 |
| ATRNL1    | 0 | 0 | 0 | 0 | 0  | 4 | 0 | 0 | 6 | 0 | 0 | 10 |
| RCSD1     | 0 | 0 | 0 | 0 | 0  | 1 | 0 | 3 | 6 | 0 | 0 | 10 |



Supplementary Table 3: prediction AMARETTO results given CNV data only, MET data only or both CNV and MET data

|          | Rsquare     |             |             | MSE         |             |             | Rsquare increase with MET | MSE decrease with MET |
|----------|-------------|-------------|-------------|-------------|-------------|-------------|---------------------------|-----------------------|
|          | CNV         | MET         | CNV and MET | CNV         | MET         | CNV and MET |                           |                       |
| BLCA     | 0.63491905  | 0.75918536  | 0.747088771 | 0.129120599 | 0.085754521 | 0.089623734 | 11%                       | 4%                    |
| BRCA     | 0.55196631  | 0.68744417  | 0.707869718 | 0.134388745 | 0.0974036   | 0.089678172 | 16%                       | 4%                    |
| COADREAD | 0.560722577 | 0.686874503 | 0.706325299 | 0.13707469  | 0.097421053 | 0.092378388 | 15%                       | 4%                    |
| GBM      | 0.625180223 | 0.711656734 | 0.717314742 | 0.140220484 | 0.113400472 | 0.11207482  | 9%                        | 3%                    |
| HNSC     | 0.631380908 | 0.744118759 | 0.743615174 | 0.140991015 | 0.099974654 | 0.098737876 | 11%                       | 4%                    |
| KIRC     | 0.651631817 | 0.734516833 | 0.712217622 | 0.123120399 | 0.095397403 | 0.101818509 | 6%                        | 2%                    |
| LAML     | 0.611068775 | 0.757019741 | 0.738212603 | 0.150347928 | 0.091011585 | 0.101038635 | 13%                       | 5%                    |
| LUAD     | 0.602504957 | 0.682858619 | 0.696236704 | 0.131973988 | 0.0995979   | 0.095490869 | 9%                        | 4%                    |
| LUSC     | 0.65723949  | 0.716856013 | 0.71251301  | 0.111968514 | 0.101453676 | 0.092118849 | 6%                        | 2%                    |
| OV       | 0.562328171 | 0.64142021  | 0.667417273 | 0.114725012 | 0.096584823 | 0.088217345 | 11%                       | 3%                    |
| UCEC     | 0.5214479   | 0.685517255 | 0.665556488 | 0.148878157 | 0.101523068 | 0.107419615 | 14%                       | 4%                    |

Supplementary Table 4: Description of the pancancer AMARETTO communities

|              | BLCA | BRCA | COADREAD | GBM | HNSC | KIRC | LAML | LUAD | LUSC | OV | UCEC | Total number of modules |
|--------------|------|------|----------|-----|------|------|------|------|------|----|------|-------------------------|
| Community 1  | 9    | 9    | 7        | 4   | 8    | 10   | 0    | 8    | 9    | 1  | 9    | 74                      |
| Community 2  | 6    | 4    | 8        | 9   | 8    | 7    | 9    | 5    | 7    | 5  | 5    | 73                      |
| Community 3  | 9    | 7    | 9        | 5   | 7    | 5    | 1    | 4    | 5    | 7  | 5    | 64                      |
| Community 4  | 9    | 5    | 3        | 0   | 10   | 3    | 0    | 6    | 9    | 5  | 5    | 55                      |
| Community 5  | 3    | 5    | 7        | 3   | 6    | 3    | 0    | 8    | 9    | 1  | 6    | 51                      |
| Community 6  | 4    | 8    | 5        | 3   | 3    | 8    | 2    | 4    | 4    | 2  | 5    | 48                      |
| Community 7  | 4    | 7    | 5        | 1   | 6    | 3    | 5    | 6    | 4    | 2  | 2    | 45                      |
| Community 8  | 2    | 3    | 1        | 4   | 2    | 3    | 1    | 3    | 1    | 3  | 5    | 28                      |
| Community 9  | 2    | 2    | 2        | 0   | 3    | 2    | 0    | 9    | 4    | 0  | 3    | 27                      |
| Community 10 | 2    | 0    | 2        | 2   | 2    | 1    | 1    | 1    | 3    | 2  | 2    | 20                      |
| Community 11 | 2    | 1    | 2        | 1   | 2    | 1    | 1    | 1    | 2    | 1  | 2    | 16                      |
| Community 12 | 1    | 2    | 1        | 1   | 2    | 0    | 1    | 2    | 2    | 1  | 2    | 15                      |
| Community 13 | 2    | 1    | 1        | 0   | 3    | 0    | 0    | 2    | 3    | 1  | 2    | 15                      |
| Community 14 | 2    | 1    | 1        | 2   | 3    | 0    | 1    | 1    | 1    | 2  | 1    | 15                      |
| Community 15 | 3    | 2    | 0        | 0   | 2    | 0    | 0    | 3    | 1    | 1  | 1    | 13                      |
| Community 16 | 1    | 1    | 2        | 0   | 2    | 1    | 1    | 1    | 1    | 1  | 1    | 12                      |
| Community 17 | 1    | 1    | 1        | 1   | 1    | 1    | 1    | 1    | 1    | 1  | 1    | 11                      |
| Community 18 | 2    | 0    | 0        | 2   | 0    | 1    | 1    | 1    | 0    | 3  | 0    | 10                      |
| Community 19 | 1    | 1    | 0        | 0   | 3    | 1    | 0    | 0    | 1    | 1  | 1    | 9                       |
| Community 20 | 0    | 1    | 0        | 2   | 1    | 0    | 1    | 1    | 1    | 1  | 1    | 9                       |

Supplementary Table 5: top driver genes and enrichment results of the smoking community

## Regulators

|          | M11_BLCA | M65_BLCA | M15_BRCA | M46_COADREAD | M27_HNSC | M41_HNSC | M57_HNSC | M10_LUAD | M72_LUAD | M64_LUSC | M99_LUSC | M71_LUSC | M72_OV | M60_UCEC | M97_UCEC | # regulated modules |
|----------|----------|----------|----------|--------------|----------|----------|----------|----------|----------|----------|----------|----------|--------|----------|----------|---------------------|
| GPX2     | 1        | 1        | 0        | 0            | 1        | 0        | 1        | 1        | 0        | 1        | 1        | 0        | 0      | 0        | 1        | 8                   |
| ABCB6    | 1        | 0        | 0        | 0            | 0        | 0        | 0        | 0        | 0        | 0        | 1        | 1        | 0      | 0        | 0        | 3                   |
| SLC7A11  | 0        | 0        | 0        | 0            | 0        | 0        | 0        | 1        | 0        | 0        | 1        | 1        | 0      | 0        | 0        | 3                   |
| CYP4F3   | 0        | 0        | 0        | 0            | 0        | 0        | 0        | 0        | 0        | 1        | 1        | 1        | 0      | 0        | 0        | 3                   |
| GPC1     | 1        | 0        | 0        | 0            | 0        | 0        | 1        | 0        | 0        | 0        | 0        | 0        | 0      | 0        | 0        | 2                   |
| CBR1     | 1        | 0        | 0        | 0            | 1        | 0        | 0        | 0        | 0        | 0        | 0        | 0        | 0      | 0        | 0        | 2                   |
| NQO1     | 1        | 0        | 0        | 0            | 0        | 0        | 0        | 0        | 0        | 0        | 0        | 0        | 0      | 0        | 1        | 2                   |
| ZNF323   | 1        | 0        | 0        | 0            | 0        | 0        | 0        | 0        | 0        | 0        | 0        | 0        | 0      | 0        | 1        | 2                   |
| UBXN10   | 0        | 0        | 1        | 0            | 0        | 0        | 0        | 0        | 0        | 0        | 0        | 0        | 0      | 1        | 0        | 2                   |
| AKR1B1   | 0        | 0        | 0        | 0            | 1        | 0        | 0        | 0        | 1        | 0        | 0        | 0        | 0      | 0        | 0        | 2                   |
| ME1      | 0        | 0        | 0        | 0            | 1        | 0        | 0        | 0        | 0        | 0        | 0        | 0        | 0      | 0        | 1        | 2                   |
| RIT1     | 0        | 0        | 0        | 0            | 1        | 0        | 1        | 0        | 0        | 0        | 0        | 0        | 0      | 0        | 0        | 2                   |
| SLC47A2  | 0        | 0        | 0        | 0            | 1        | 0        | 0        | 0        | 0        | 1        | 0        | 0        | 0      | 0        | 0        | 2                   |
| UCHL1    | 0        | 0        | 0        | 0            | 0        | 0        | 1        | 0        | 1        | 0        | 0        | 0        | 0      | 0        | 0        | 2                   |
| GSR      | 0        | 0        | 0        | 0            | 0        | 0        | 0        | 1        | 1        | 0        | 0        | 0        | 0      | 0        | 0        | 2                   |
| ABCC2    | 0        | 0        | 0        | 0            | 0        | 0        | 0        | 1        | 1        | 0        | 0        | 0        | 0      | 0        | 0        | 2                   |
| KIAA1324 | 0        | 0        | 0        | 0            | 0        | 0        | 0        | 0        | 0        | 0        | 0        | 0        | 1      | 1        | 0        | 2                   |
| SPATA18  | 0        | 0        | 0        | 0            | 0        | 0        | 0        | 0        | 0        | 0        | 0        | 0        | 1      | 1        | 0        | 2                   |
| CAPS     | 0        | 0        | 0        | 0            | 0        | 0        | 0        | 0        | 0        | 0        | 0        | 0        | 1      | 1        | 0        | 2                   |
| AKR1B10  | 0        | 0        | 0        | 0            | 0        | 0        | 0        | 0        | 0        | 1        | 1        | 0        | 0      | 0        | 0        | 2                   |
| ABHD4    | 0        | 0        | 0        | 0            | 0        | 0        | 0        | 0        | 0        | 0        | 1        | 1        | 0      | 0        | 0        | 2                   |
| CYP4F11  | 0        | 0        | 0        | 0            | 0        | 0        | 0        | 0        | 0        | 0        | 1        | 1        | 0      | 0        | 0        | 2                   |
| SOST     | 0        | 0        | 0        | 0            | 0        | 0        | 0        | 0        | 0        | 0        | 1        | 1        | 0      | 0        | 0        | 2                   |

## Gene enrichment

| Gene set                                     | M11_BLCA | M65_BLCA  | M15_BRCA    | M46_COADREAD | M27_HNSC | M41_HNSC | M57_HNSC | M10_LUAD  | M72_LUAD | M64_LUSC | M99_LUSC | M71_LUSC | M72_OV   | M60_UCEC | M97_UCEC | # significant enrichments | Averaged p-value |          |
|----------------------------------------------|----------|-----------|-------------|--------------|----------|----------|----------|-----------|----------|----------|----------|----------|----------|----------|----------|---------------------------|------------------|----------|
| NFE2L2.V2                                    | 2.95E-14 | 0.1205776 | 1           | 1            | 8.51E-12 | 1        | 1        | 1.05E-18  | 1        | 4.43E-02 | 8.39E-27 | 2.88E-07 | 1        | 1        | 4.25E-07 | 7                         | 1.44E-02         |          |
| 17115125-SuppTable2                          | 1.50E-14 | 1         | 1           | 1            | 4.25E-14 | 1        | 1        | 4.00E-20  | 1        | 1.97E-05 | 3.44E-16 | 1        | 1        | 1        | 2.50E-09 | 6                         | 3.29E-06         |          |
| 17115125-SuppTable4                          | 5.39E-09 | 1         | 1           | 1            | 1.35E-06 | 1        | 1        | 3.54E-11  | 1        | 2.86E-06 | 1        | 1        | 1        | 1        | 8.15E-03 | 5                         | 8.45E-07         |          |
| 19334046-TableS3a                            | 8.54E-09 | 1         | 1           | 1            | 2.00E-06 | 1        | 1        | 5.71E-13  | 1        | 1        | 1        | 2.42E-05 | 1        | 1        | 4.06E-10 | 5                         | 5.24E-06         |          |
| OXIDOREDUCTASE_ACTIVITY                      | 1.88E-05 | 1         | 1           | 1            | 3.63E-05 | 1        | 1        | 3.66E-08  | 1        | 1        | 7.69E-07 | 1        | 1        | 1        | 9.32E-07 | 5                         | 1.14E-05         |          |
| 17115125-SuppTable6                          | 7.25E-07 | 1         | 1           | 1            | 1        | 1        | 1        | 3.36E-09  | 1        | 2.68E-06 | 1        | 1        | 1        | 1        | 2.36E-10 | 4                         | 8.51E-07         |          |
| ONDER_CDH1_TARGETS_1_UP                      | 1.07E-05 | 1         | 1           | 1            | 1.86E-05 | 1        | 1        | 3.24E-04  | 1        | 1        | 2.32E-04 | 1        | 1        | 1        | 1        | 1                         | 4                | 1.46E-04 |
| HALLMARK_XENOBIOTIC_METABOLISM               | 9.09E-05 | 1         | 1           | 1            | 2.80E-06 | 1        | 1        | 2.68E-03  | 1        | 1        | 2.86E-08 | 1        | 1        | 1        | 1        | 1                         | 4                | 6.95E-04 |
| 16491124-SuppTable1                          | 1        | 1         | 1           | 7.57E-04     | 1        | 1        | 1        | 1         | 1        | 1        | 1        | 1        | 1.05E-04 | 1.67E-05 | 1        | 1                         | 3                | 2.93E-04 |
| 19204204-SupplementaryTable2                 | 1        | 1         | 0.132088818 | 0.828638008  | 7.09E-06 | 2.22E-03 | 1        | 1         | 1        | 1        | 1        | 1        | 1        | 1        | 3.19E-04 | 1                         | 3                | 6.49E-02 |
| DOANE_BREAST_CANCER_ESR1_UP                  | 1        | 1         | 1           | 7.18E-04     | 1        | 1        | 1        | 1         | 1        | 1        | 1        | 1        | 9.96E-05 | 1.57E-05 | 1        | 1                         | 3                | 2.78E-04 |
| KAN_RESPONSE_TO_ARSENIC_TRIOXIDE             | 4.87E-06 | 1         | 1           | 1            | 8.48E-06 | 1        | 1        | 1.49E-04  | 1        | 1        | 1        | 1        | 1        | 1        | 1        | 1                         | 3                | 5.41E-05 |
| WOOD_EBV_EBNA1_TARGETS_UP                    | 2.47E-06 | 1         | 1           | 1            | 1        | 1        | 1        | 7.61E-05  | 1        | 1        | 8.45E-07 | 1        | 1        | 1        | 1        | 1                         | 3                | 2.65E-05 |
| 19306456-TableS2b                            | 1        | 1         | 1.33E-02    | 3.02E-04     | 1        | 1        | 1        | 1         | 1        | 1        | 1        | 1        | 1        | 1        | 1        | 1                         | 2                | 6.82E-03 |
| 16115903-TableS1                             | 1        | 1         | 1           | 1.28E-02     | 1        | 1        | 1        | 1         | 1        | 1        | 1        | 1        | 1.33E-03 | 1        | 1        | 1                         | 2                | 7.07E-03 |
| 17115125-SuppTable3                          | 8.99E-11 | 1         | 1           | 1            | 1        | 1        | 1        | 1.48E-14  | 1        | 1        | 1        | 1        | 1        | 1        | 1        | 1                         | 2                | 4.50E-11 |
| 19489030-SuppTable4                          | 1.55E-05 | 1         | 1           | 1            | 1        | 1        | 1        | 1         | 1        | 1        | 2.62E-11 | 1        | 1        | 1        | 1        | 1                         | 2                | 7.76E-06 |
| 18662380-S3-ESR1                             | 1        | 1         | 1           | 1.14E-04     | 1        | 1        | 1        | 1         | 1        | 1        | 1        | 1        | 2.58E-02 | 1        | 1        | 1                         | 2                | 1.86E-02 |
| 17603561-STable1                             | 1        | 1         | 1           | 1.72E-02     | 1        | 1        | 1        | 1         | 1        | 1        | 1        | 1        | 7.53E-05 | 1        | 1        | 1                         | 2                | 8.65E-03 |
| 16912175-SuppTable3b                         | 1        | 1         | 1           | 2.01E-04     | 1        | 1        | 1        | 1         | 1        | 1        | 1        | 1        | 1        | 4.18E-02 | 1        | 1                         | 2                | 2.10E-02 |
| 19204204-SupplementaryTable6                 | 1        | 1         | 4.21E-02    | 1            | 2.00E-02 | 1        | 1        | 1         | 1        | 1        | 1        | 1        | 1        | 1        | 1        | 1                         | 2                | 3.11E-02 |
| 19204204-SupplementaryTable3                 | 1        | 1         | 4.01E-02    | 1            | 1.95E-02 | 1        | 1        | 1         | 1        | 1        | 1        | 1        | 1        | 1        | 1        | 1                         | 2                | 3.02E-02 |
| LIU_PROSTATE_CANCER_DN                       | 1        | 1         | 5.86E-03    | 1            | 1        | 1.53E-02 | 1        | 1         | 1        | 1        | 1        | 1        | 1        | 1        | 1        | 1                         | 2                | 1.06E-02 |
| SENGUPTA_NASOPHARYNGEAL_CARCINOMA_DN         | 1        | 1         | 1           | 2.88E-03     | 1        | 1        | 1        | 1         | 1        | 1        | 1        | 1        | 1        | 2.49E-03 | 1        | 1                         | 2                | 2.69E-03 |
| RUTELLA_RESPONSE_TO_HGF_UP                   | 1        | 1         | 1           | 1            | 1.21E-02 | 1        | 1        | 0.1845591 | 1        | 1        | 8.48E-03 | 1        | 1        | 1        | 1        | 1                         | 2                | 2.26E-02 |
| RUTELLA_RESPONSE_TO_HGF_VS_CSF2RB_AND_IL4_UP | 1        | 1         | 1           | 1            | 1.05E-02 | 1        | 1        | 0.1610243 | 1        | 1        | 7.22E-03 | 1        | 1        | 1        | 1        | 1                         | 2                | 1.96E-02 |
| CARBOXYLIC_ACID_METABOLIC_PROCESS            | 1        | 1         | 1           | 1            | 1        | 1        | 1        | 1.35E-03  | 1        | 1        | 5.37E-07 | 1        | 1        | 1        | 1        | 1                         | 2                | 6.75E-04 |
| ORGANIC_ACID_METABOLIC_PROCESS               | 1        | 1         | 1           | 1            | 1        | 1        | 1        | 1.44E-03  | 1        | 1        | 5.90E-07 | 1        | 1        | 1        | 1        | 1                         | 2                | 7.21E-04 |

Supplementary Table 6: (a) Signatures used for validation of GPX2 and correlation results  
 (b) Correlation results of GPX2 expression with smoking clinical data

(a)

**Signatures**

| Oxidative gene signature | Xenobiotic metabolism gene signature |
|--------------------------|--------------------------------------|
| ANGPTL7                  | NCEH1                                |
| APOA4                    | GSTM4                                |
| APT X                    | ACSM2B                               |
| ATOX1                    | AOC1                                 |
| CCL5                     | GSTM3                                |
| CYGB                     | MGST2                                |
| DGKK                     | DPEP1                                |
| DHCR24                   | AIP                                  |
| DUSP1                    | AS3MT                                |
| ERCC1                    | RORC                                 |
| ERCC2                    | UGT1A8                               |
| ERCC3                    | UGT1A10                              |
| ERCC6                    | UGT1A7                               |
| ERCC8                    | GSTO1                                |
| GCLC                     | GGT2                                 |
| GCLM                     | UGT2B28                              |
| GLRX2                    | CES1                                 |
| GPX3                     | PON3                                 |
| GSS                      | GRIN1                                |
| IPCEF1                   | NAT2                                 |
| MPO                      | MGST1                                |
| MSRA                     | GSTM2                                |
| NDUFA12                  | ACSM1                                |
| NDUFA6                   | FMO3                                 |
| NDUFB4                   | SULT1A2                              |
| NDUFS2                   | SULT1A1                              |
| NDUFS8                   | CYP1A1                               |
| NUDT1                    | PTGS1                                |
| OXS R1                   | UGT2B4                               |
| PDLIM1                   | FMO2                                 |
| PNKP                     | ACY3                                 |
| PRDX2                    | SULT1B1                              |
| PRDX5                    | EPHX2                                |
| PRDX6                    | ACY1                                 |
| PRNP                     | MGST3                                |

RNF7  
S100A7  
SCARA3  
SELS  
SEPP1  
SGK2  
SOD1  
SOD2  
SRXN1  
STK25  
TXNRD2

CYP3A7  
GSTA4  
FMO1  
GSTM1  
CYP2W1  
CYP2C9  
NAT1  
STAR  
SULT1A3  
UGT1A9  
GSTP1  
AKR7A3  
GGT1  
CYP2F1  
AKR1C1  
UGT2B11  
CYP46A1  
CMBL  
UGT1A6  
AADAC  
ALDH3A1  
AOC2  
CYP2A13  
CYP1B1  
AKR7A2  
UGT1A4  
UGT1A1  
GSTO2  
AOC3  
CYP3A4  
CYP2D7  
CYP2E1  
CYP1A2  
AHR  
UGT2B15  
UGT1A5  
UGT1A3  
HNF4A  
RORA  
BPHL  
CYP2C19

CYP2C18  
 CES2  
 POR  
 ACSL1  
 NR1I2  
 CYP2J2  
 CYP2B6  
 GLYAT  
 NQO1  
 CYP2D6  
 CYP2C8  
 AKR7L  
 LPO  
 EPHX1  
 CYP3A5  
 CYP26A1  
 CYP26B1  
 S100A12  
 CRYZ

## Correlations

|          | Oxidative signature |                 | Xenobiotic signature |                 |
|----------|---------------------|-----------------|----------------------|-----------------|
|          | Correlation         | p-value         | Correlation          | p-value         |
| BLCA     | -0.007815478        | 8.75E-01        | <b>0.5368829</b>     | <b>1.29E-32</b> |
| BRCA     | <b>0.175857826</b>  | <b>4.83E-07</b> | <b>0.2936691</b>     | <b>3.50E-22</b> |
| COADREAD | <b>0.12825616</b>   | <b>3.37E-03</b> | <b>0.1633479</b>     | <b>1.38E-05</b> |
| HNSC     | <b>0.24393133</b>   | <b>1.16E-06</b> | <b>0.6525858</b>     | <b>2.05E-64</b> |
| LUAD     | <b>0.422645132</b>  | <b>1.98E-20</b> | <b>0.6229901</b>     | <b>1.85E-55</b> |
| LUSC     | <b>0.257088866</b>  | <b>2.10E-09</b> | <b>0.5053464</b>     | <b>2.85E-34</b> |
| OV       | 0.040147626         | 3.51E-01        | <b>0.2494615</b>     | <b>4.05E-09</b> |
| UCEC     | <b>0.240126434</b>  | <b>6.20E-08</b> | <b>0.3462708</b>     | <b>1.10E-17</b> |

(b)

|      | Smoking profile |                   | Number of smoked years |                   |                   | Pack years        |                    |                   |
|------|-----------------|-------------------|------------------------|-------------------|-------------------|-------------------|--------------------|-------------------|
|      | p-value         | Percentage of NAs | Correlation            | p-value           | Percentage of NAs | Correlation       | p-value            | Percentage of NAs |
| BLCA | <b>0.05</b>     | 8%                | NA                     | NA                | 100%              | 0.11257321        | 0.259951146        | 43%               |
| HNSC | <b>1.50E-08</b> | 8%                | <b>0.25042771</b>      | <b>0.01112927</b> | 63%               | <b>0.21146548</b> | <b>0.003001313</b> | 47%               |
| LUAD | 0.26            | 9%                | 0.08253822             | 0.2845951         | 62%               | -0.00863001       | 0.879323118        | 36%               |
| LUSC | 0.21            | 18%               | 0.03909737             | 0.59127115        | 68%               | -0.03396215       | 0.528338745        | 29%               |

Supplementary Table 7: Experimental validation of the modules and their target genes regulated by GPX2 as a causative driver of the pancancer smoking community.

SUMMARY

| Cancer  | Module | consensus (A549/CGS001_A549_96H.GPX2.1) | shRNA2 (A549/KDC007_A549_96H.TRCN0000046238.666) | shRNA1 (A549/KDC007_A549_96H.TRCN0000046239.666) | Size # genes in module | Size # genes measured in LINC | Size Leading Edge | Size Leading Edge shRNA2 (A549/KDC007_A549_96H.TRCN0000046238.666) | Size Leading Edge shRNA1 (A549/KDC007_A549_96H.TRCN0000046239.666) |
|---------|--------|-----------------------------------------|--------------------------------------------------|--------------------------------------------------|------------------------|-------------------------------|-------------------|--------------------------------------------------------------------|--------------------------------------------------------------------|
| LUAD    | 10     | P-value<0.0001 & FDR<0.0001             | P-value<0.0001 & FDR<0.0001                      | P-value=0.0039 & FDR=0.0040                      | 39                     | 15                            | 11                | 11                                                                 | 10                                                                 |
| LUSC    | 64     | P-value=0.3194 & FDR=0.3176             | P-value=0.0919 & FDR=0.1311                      | P-value=0.3152 & FDR=0.2990                      | 29                     | 11                            |                   | 6                                                                  |                                                                    |
|         | 99     | P-value<0.0001 & FDR<0.0001             | P-value<0.0001 & FDR<0.0001                      | P-value<0.0001 & FDR<0.0001                      | 41                     | 25                            | 19                | 17                                                                 | 20                                                                 |
| BLCA    | 11     | P-value<0.0001 & FDR=0.0051             | P-value<0.0001 & FDR=0.0059                      | P-value<0.0001 & FDR=0.0010                      | 23                     | 14                            | 9                 | 10                                                                 | 10                                                                 |
|         | 65     | P-value=0.1846 & FDR=0.3592             | P-value=0.2718 & FDR=0.2760                      | P-value=0.0809 & FDR=0.1511                      | 30                     | 6                             |                   |                                                                    | 5                                                                  |
| HNSC    | 27     | P-value=0.1176 & FDR=0.1307             | P-value=0.1582 & FDR=0.1784                      | P-value=0.0325 & FDR=0.0374                      | 28                     | 18                            | 14                | 9                                                                  | 12                                                                 |
|         | 57     | P-value=0.6747 & FDR=0.6836             | P-value=0.7072 & FDR=0.7117                      | P-value=0.7390 & FDR=0.7393                      | 31                     | 6                             |                   |                                                                    |                                                                    |
| UCEC    | 97     | P-value=0.0062 & FDR=0.0054             | P-value=0.0104 & FDR=0.0095                      | P-value=0.0042 & FDR=0.0044                      | 16                     | 9                             | 8                 | 7                                                                  | 8                                                                  |
| LUAD    | 10     | NES=-2.4871                             | NES=-2.549                                       | NES=-2.085                                       | 39                     | 15                            | 11                | 11                                                                 | 10                                                                 |
| LUSC    | 64     | NES=-1.1048                             | NES=-1.4226                                      | NES=-1.1213                                      | 29                     | 11                            |                   | 6                                                                  |                                                                    |
|         | 99     | NES=-2.4916                             | NES=-2.2605                                      | NES=-2.6911                                      | 41                     | 25                            | 19                | 17                                                                 | 20                                                                 |
| BLCA    | 11     | NES=-2.0557                             | NES=-2.0557                                      | NES=-2.2099                                      | 23                     | 14                            | 9                 | 10                                                                 | 10                                                                 |
|         | 65     | NES=-1.2769                             | NES=1.1567                                       | NES=1.4928                                       | 30                     | 6                             |                   |                                                                    | 5                                                                  |
| HNSC    | 27     | NES=-1.3909                             | NES=-1.3095                                      | NES=-1.6539                                      | 28                     | 18                            | 14                | 9                                                                  | 12                                                                 |
|         | 57     | NES=0.8261                              | NES=-0.8042                                      | NES=0.7859                                       | 31                     | 6                             |                   |                                                                    |                                                                    |
| UCEC    | 97     | NES=-1.9858                             | NES=-1.947                                       | NES=-1.9961                                      | 16                     | 9                             | 8                 | 7                                                                  | 8                                                                  |
| z-score | GPX2   | -0.5892                                 | -0.7039                                          | -0.775                                           |                        |                               |                   |                                                                    |                                                                    |

Experimental validation results on the gene level. Table shows the detailed GSEA enrichment results for the target genes of GPX2 in each of the three perturbation experiments upon GPX2 knockdown in the lung adenocarcinoma A549 cell line derived from LINC (columns: consensus, shRNA1, shRNA2) in each of the 8 modules regulated by GPX2 in the 5 cancer sites (rows: modules organized by the 5 sites in the following order: LUAD, LUSC, BLCA, HNSC, UCEC). For each of the 8 modules in the 5 cancer sites, we enlisted the predicted target genes of modules regulated by GPX2 as an activator of its targets. The z-score for each GPX2 knockdown experiment and each target gene is shown. Target genes repressed and induced by GPX2 knockdown experiments are represented in blue and red, respectively, and those that were identified as 'leading edge' genes driving the GSEA enrichment scores are highlighted in bold. The leading edge columns indicate whether the target gene is part of the leading edge gene set, and a value of NA is shown if the enrichment is not significant (FDR>0.25). Genes are sorted from highest negative z-score to highest positive z-score in the consensus signature. The rightmost column indicates whether genes are part of the LINC landmark or bing rowspaces in yellow, and visualized in grey if not a member of these rowspaces.

DETAILED

| Cancer | Module | P-value & FDR consensus (A549/CGS001_A549_96H.GPX2.1) | P-value & FDR shRNA2 (A549/KDC007_A549_96H.TRCN0000046238.666) | P-value & FDR shRNA1 (A549/KDC007_A549_96H.TRCN0000046239.666) | Gene     | z-scores consensus (A549/CGS001_A549_96H.GPX2.1) | z-scores shRNA2 (A549/KDC007_A549_96H.TRCN0000046238.666) | z-scores shRNA1 (A549/KDC007_A549_96H.TRCN0000046239.666) | Leading Edge consensus (A549/CGS001_A549_96H.GPX2.1) | Leading Edge shRNA2 (A549/KDC007_A549_96H.TRCN0000046238.666) | Leading Edge shRNA1 (A549/KDC007_A549_96H.TRCN0000046239.666) | Measured in LINC |
|--------|--------|-------------------------------------------------------|----------------------------------------------------------------|----------------------------------------------------------------|----------|--------------------------------------------------|-----------------------------------------------------------|-----------------------------------------------------------|------------------------------------------------------|---------------------------------------------------------------|---------------------------------------------------------------|------------------|
| LUAD   | 10     | P-value<0.0001 & FDR<0.0001                           | P-value<0.0001 & FDR<0.0001                                    | P-value=0.0039 & FDR=0.0040                                    | NQO1     | -3.9077                                          | -5.05                                                     | -4.1151                                                   | yes                                                  | yes                                                           | yes                                                           | yes              |
|        |        |                                                       |                                                                |                                                                | AKR1C2   | -1.5429                                          | -1.397                                                    | -1.9425                                                   | yes                                                  | yes                                                           | yes                                                           | yes              |
|        |        |                                                       |                                                                |                                                                | AKR1C1   | -1.4129                                          | -1.2672                                                   | -1.7733                                                   | yes                                                  | yes                                                           | yes                                                           | yes              |
|        |        |                                                       |                                                                |                                                                | PIR      | -1.1001                                          | -1.5504                                                   | -1.2525                                                   | yes                                                  | yes                                                           | yes                                                           | yes              |
|        |        |                                                       |                                                                |                                                                | AKR1C3   | -1.0573                                          | -1.5112                                                   | -0.8801                                                   | yes                                                  | yes                                                           | yes                                                           | yes              |
|        |        |                                                       |                                                                |                                                                | ALDH3A1  | -0.8894                                          | -0.6218                                                   | -1.5314                                                   | yes                                                  | yes                                                           | yes                                                           | yes              |
|        |        |                                                       |                                                                |                                                                | SLC7A11  | -0.765                                           | -0.7579                                                   | -0.9556                                                   | yes                                                  | yes                                                           | yes                                                           | yes              |
|        |        |                                                       |                                                                |                                                                | GULP1    | -0.7022                                          | 0.4383                                                    | -1.6805                                                   | yes                                                  | no                                                            | yes                                                           | yes              |
|        |        |                                                       |                                                                |                                                                | TPD52L1  | -0.5999                                          | -0.8206                                                   | -0.288                                                    | yes                                                  | yes                                                           | no                                                            | yes              |
|        |        |                                                       |                                                                |                                                                | AKR1B10  | -0.5828                                          | -1.0199                                                   | -0.5283                                                   | yes                                                  | yes                                                           | no                                                            | yes              |
|        |        |                                                       |                                                                |                                                                | SLC27A2  | -0.5489                                          | -0.6873                                                   | -0.3873                                                   | yes                                                  | yes                                                           | no                                                            | yes              |
|        |        |                                                       |                                                                |                                                                | CES1     | -0.3253                                          | 0.527                                                     | -1.0298                                                   | no                                                   | no                                                            | yes                                                           | yes              |
|        |        |                                                       |                                                                |                                                                | HGD      | -0.1697                                          | -0.9737                                                   | 0.3265                                                    | no                                                   | yes                                                           | no                                                            | yes              |
|        |        |                                                       |                                                                |                                                                | CYP4F3   | -0.1391                                          | 0.5664                                                    | -0.7957                                                   | no                                                   | no                                                            | yes                                                           | yes              |
|        |        |                                                       |                                                                |                                                                | CBR3     | 0.0549                                           | -0.0434                                                   | 0.0346                                                    | no                                                   | no                                                            | no                                                            | yes              |
|        |        |                                                       |                                                                |                                                                | ALOX12P2 | NA                                               | NA                                                        | NA                                                        | NA                                                   | NA                                                            | NA                                                            | no               |
|        |        |                                                       |                                                                |                                                                | ATAT1    | NA                                               | NA                                                        | NA                                                        | NA                                                   | NA                                                            | NA                                                            | no               |
|        |        |                                                       |                                                                |                                                                | BTBD11   | NA                                               | NA                                                        | NA                                                        | NA                                                   | NA                                                            | NA                                                            | no               |

|      |    |                             |                             |                             |            |         |         |         |     |     |     |     |
|------|----|-----------------------------|-----------------------------|-----------------------------|------------|---------|---------|---------|-----|-----|-----|-----|
|      |    |                             |                             |                             | CA8        | NA      | NA      | NA      | NA  | NA  | NA  | no  |
|      |    |                             |                             |                             | CES1P1     | NA      | NA      | NA      | NA  | NA  | NA  | no  |
|      |    |                             |                             |                             | CKMT1A     | NA      | NA      | NA      | NA  | NA  | NA  | no  |
|      |    |                             |                             |                             | CKMT1B     | NA      | NA      | NA      | NA  | NA  | NA  | no  |
|      |    |                             |                             |                             | CYP4F11    | NA      | NA      | NA      | NA  | NA  | NA  | no  |
|      |    |                             |                             |                             | FAM110C    | NA      | NA      | NA      | NA  | NA  | NA  | no  |
|      |    |                             |                             |                             | GNAL       | NA      | NA      | NA      | NA  | NA  | NA  | no  |
|      |    |                             |                             |                             | GRM1       | NA      | NA      | NA      | NA  | NA  | NA  | no  |
|      |    |                             |                             |                             | HOGA1      | NA      | NA      | NA      | NA  | NA  | NA  | no  |
|      |    |                             |                             |                             | JAKMIP3    | NA      | NA      | NA      | NA  | NA  | NA  | no  |
|      |    |                             |                             |                             | LINC01554  | NA      | NA      | NA      | NA  | NA  | NA  | no  |
|      |    |                             |                             |                             | NRG4       | NA      | NA      | NA      | NA  | NA  | NA  | no  |
|      |    |                             |                             |                             | OSGIN1     | NA      | NA      | NA      | NA  | NA  | NA  | no  |
|      |    |                             |                             |                             | PCDHA13    | NA      | NA      | NA      | NA  | NA  | NA  | no  |
|      |    |                             |                             |                             | PPP2R2C    | NA      | NA      | NA      | NA  | NA  | NA  | no  |
|      |    |                             |                             |                             | RASAL1     | NA      | NA      | NA      | NA  | NA  | NA  | no  |
|      |    |                             |                             |                             | SLC44A5    | NA      | NA      | NA      | NA  | NA  | NA  | no  |
|      |    |                             |                             |                             | SLC9A2     | NA      | NA      | NA      | NA  | NA  | NA  | no  |
|      |    |                             |                             |                             | TAT        | NA      | NA      | NA      | NA  | NA  | NA  | no  |
|      |    |                             |                             |                             | UGT1A6     | NA      | NA      | NA      | NA  | NA  | NA  | no  |
|      |    |                             |                             |                             | WIPF3      | NA      | NA      | NA      | NA  | NA  | NA  | no  |
| LUSC | 64 | P-value=0.3194 & FDR=0.3176 | P-value=0.0919 & FDR=0.1311 | P-value=0.3152 & FDR=0.2990 | AKR1C2     | -1.5429 | -1.397  | -1.9425 | NA  | yes | NA  | yes |
|      |    |                             |                             |                             | ALDH3A1    | -0.8894 | -0.6218 | -1.5314 | NA  | yes | NA  | yes |
|      |    |                             |                             |                             | IGFBP3     | -0.7059 | 0.0352  | -1.239  | NA  | no  | NA  | yes |
|      |    |                             |                             |                             | NMB        | -0.7045 | -0.5993 | -0.9201 | NA  | yes | NA  | yes |
|      |    |                             |                             |                             | AKR1B10    | -0.5828 | -1.0199 | -0.5283 | NA  | yes | NA  | yes |
|      |    |                             |                             |                             | GABRE      | -0.3885 | -0.646  | -0.4588 | NA  | yes | NA  | yes |
|      |    |                             |                             |                             | DNASE1L3   | -0.2633 | 0.4008  | -0.7632 | NA  | no  | NA  | yes |
|      |    |                             |                             |                             | CCNA1      | 0.6155  | 0.1569  | 1.1229  | NA  | no  | NA  | yes |
|      |    |                             |                             |                             | FLG        | 0.8481  | 1.0695  | 0.7032  | NA  | no  | NA  | yes |
|      |    |                             |                             |                             | GSTM1      | 0.8944  | 0.8134  | 0.9605  | NA  | no  | NA  | yes |
|      |    |                             |                             |                             | FGFR1      | 1.1187  | -0.8718 | 2.2158  | NA  | yes | NA  | yes |
|      |    |                             |                             |                             | ADH7       | NA      | NA      | NA      | NA  | NA  | NA  | no  |
|      |    |                             |                             |                             | ANKRD2     | NA      | NA      | NA      | NA  | NA  | NA  | no  |
|      |    |                             |                             |                             | AQP10      | NA      | NA      | NA      | NA  | NA  | NA  | no  |
|      |    |                             |                             |                             | ARTN       | NA      | NA      | NA      | NA  | NA  | NA  | no  |
|      |    |                             |                             |                             | BTBD11     | NA      | NA      | NA      | NA  | NA  | NA  | no  |
|      |    |                             |                             |                             | CAGE1      | NA      | NA      | NA      | NA  | NA  | NA  | no  |
|      |    |                             |                             |                             | CHP2       | NA      | NA      | NA      | NA  | NA  | NA  | no  |
|      |    |                             |                             |                             | CLDN8      | NA      | NA      | NA      | NA  | NA  | NA  | no  |
|      |    |                             |                             |                             | CREG2      | NA      | NA      | NA      | NA  | NA  | NA  | no  |
|      |    |                             |                             |                             | FAM110C    | NA      | NA      | NA      | NA  | NA  | NA  | no  |
|      |    |                             |                             |                             | GPNMB      | NA      | NA      | NA      | NA  | NA  | NA  | no  |
|      |    |                             |                             |                             | LEXM       | NA      | NA      | NA      | NA  | NA  | NA  | no  |
|      |    |                             |                             |                             | LOC285629  | NA      | NA      | NA      | NA  | NA  | NA  | no  |
|      |    |                             |                             |                             | NRG4       | NA      | NA      | NA      | NA  | NA  | NA  | no  |
|      |    |                             |                             |                             | PHEX       | NA      | NA      | NA      | NA  | NA  | NA  | no  |
|      |    |                             |                             |                             | RNF217-AS1 | NA      | NA      | NA      | NA  | NA  | NA  | no  |
|      |    |                             |                             |                             | SLC47A2    | NA      | NA      | NA      | NA  | NA  | NA  | no  |
|      |    |                             |                             |                             | UGT1A6     | NA      | NA      | NA      | NA  | NA  | NA  | no  |
|      | 99 | P-value<0.0001 & FDR<0.0001 | P-value<0.0001 & FDR<0.0001 | P-value<0.0001 & FDR<0.0001 | NQO1       | -3.9077 | -5.05   | -4.1151 | yes | yes | yes | yes |
|      |    |                             |                             |                             | TXNRD1     | -3.5245 | -5.0027 | -3.5326 | yes | yes | yes | yes |
|      |    |                             |                             |                             | AKR1C1     | -1.4129 | -1.2672 | -1.7733 | yes | yes | yes | yes |
|      |    |                             |                             |                             | G6PD       | -1.2406 | -1.3019 | -1.7672 | yes | yes | yes | yes |
|      |    |                             |                             |                             | TRIM16     | -1.1942 | -0.8852 | -1.726  | yes | yes | yes | yes |
|      |    |                             |                             |                             | AKR1C3     | -1.0573 | -1.5112 | -0.8801 | yes | yes | yes | yes |
|      |    |                             |                             |                             | GCLM       | -1.0461 | -1.0761 | -1.133  | yes | yes | yes | yes |
|      |    |                             |                             |                             | PHGDH      | -0.9391 | -1.2214 | -1.1398 | yes | yes | yes | yes |
|      |    |                             |                             |                             | UBL4A      | -0.8477 | -1.1137 | -0.894  | yes | yes | yes | yes |
|      |    |                             |                             |                             | PGD        | -0.7854 | -0.5597 | -1.4009 | yes | yes | yes | yes |
|      |    |                             |                             |                             | ME1        | -0.7668 | -1.6032 | -0.7622 | yes | yes | yes | yes |
|      |    |                             |                             |                             | SLC7A11    | -0.765  | -0.7579 | -0.9556 | yes | yes | yes | yes |
|      |    |                             |                             |                             | GSR        | -0.6728 | 0.1165  | -1.0326 | yes | no  | yes | yes |
|      |    |                             |                             |                             | TIMP4      | -0.5654 | -1.2904 | -0.5245 | yes | yes | yes | yes |
|      |    |                             |                             |                             | CBR1       | -0.5507 | -0.3507 | -0.7467 | yes | yes | yes | yes |
|      |    |                             |                             |                             | GCLC       | -0.4777 | -0.3749 | -0.6569 | yes | yes | yes | yes |
|      |    |                             |                             |                             | LPCAT1     | -0.4186 | -0.5052 | -0.7413 | yes | yes | yes | yes |
|      |    |                             |                             |                             | ABCC3      | -0.3173 | -0.7101 | -0.3496 | yes | yes | no  | yes |



|      |    |                             |                             |                             |         |         |         |         |     |     |     |
|------|----|-----------------------------|-----------------------------|-----------------------------|---------|---------|---------|---------|-----|-----|-----|
|      |    |                             |                             | ABCC2                       | -0.3033 | 0.1059  | -0.9073 | yes     | no  | yes | yes |
|      |    |                             |                             | CYP4F3                      | -0.1391 | 0.5664  | -0.7957 | no      | no  | yes | yes |
|      |    |                             |                             | SLC7A5                      | 0       | 0       | 0       | no      | no  | no  | yes |
|      |    |                             |                             | CBR3                        | 0.0549  | -0.0434 | 0.0346  | no      | no  | no  | yes |
|      |    |                             |                             | EGF                         | 0.2223  | 0.592   | 0.0753  | no      | no  | no  | yes |
|      |    |                             |                             | TNFSF9                      | 0.5654  | 2.1874  | -0.4707 | no      | no  | yes | yes |
|      |    |                             |                             | STC2                        | 1.0092  | 1.7661  | 0.6807  | no      | no  | no  | yes |
|      |    |                             |                             | ABCA4                       | NA      | NA      | NA      | NA      | NA  | NA  | no  |
|      |    |                             |                             | CDRT1                       | NA      | NA      | NA      | NA      | NA  | NA  | no  |
|      |    |                             |                             | CYP4F11                     | NA      | NA      | NA      | NA      | NA  | NA  | no  |
|      |    |                             |                             | FBXW10                      | NA      | NA      | NA      | NA      | NA  | NA  | no  |
|      |    |                             |                             | GCSH                        | NA      | NA      | NA      | NA      | NA  | NA  | no  |
|      |    |                             |                             | GPAT3                       | NA      | NA      | NA      | NA      | NA  | NA  | no  |
|      |    |                             |                             | HHIPL2                      | NA      | NA      | NA      | NA      | NA  | NA  | no  |
|      |    |                             |                             | NKX2-8                      | NA      | NA      | NA      | NA      | NA  | NA  | no  |
|      |    |                             |                             | OSGIN1                      | NA      | NA      | NA      | NA      | NA  | NA  | no  |
|      |    |                             |                             | PANX2                       | NA      | NA      | NA      | NA      | NA  | NA  | no  |
|      |    |                             |                             | PCDHB16                     | NA      | NA      | NA      | NA      | NA  | NA  | no  |
|      |    |                             |                             | PPP2R2C                     | NA      | NA      | NA      | NA      | NA  | NA  | no  |
|      |    |                             |                             | PTGR1                       | NA      | NA      | NA      | NA      | NA  | NA  | no  |
|      |    |                             |                             | SRXN1                       | NA      | NA      | NA      | NA      | NA  | NA  | no  |
|      |    |                             |                             | TRIM16L                     | NA      | NA      | NA      | NA      | NA  | NA  | no  |
|      |    |                             |                             | VSIG10L                     | NA      | NA      | NA      | NA      | NA  | NA  | no  |
| BLCA | 11 | P-value<0.0001 & FDR=0.0051 | P-value<0.0001 & FDR=0.0059 | P-value<0.0001 & FDR=0.0010 | NQO1    | -3.9077 | -5.05   | -4.1151 | yes | yes | yes |
|      |    |                             |                             |                             | AKR1C2  | -1.5429 | -1.397  | -1.9425 | yes | yes | yes |
|      |    |                             |                             |                             | AKR1C1  | -1.4129 | -1.2672 | -1.7733 | yes | yes | yes |
|      |    |                             |                             |                             | PIR     | -1.1001 | -1.5504 | -1.2525 | yes | yes | yes |
|      |    |                             |                             |                             | AKR1C3  | -1.0573 | -1.5112 | -0.8801 | yes | yes | yes |
|      |    |                             |                             |                             | ALDH3A1 | -0.8894 | -0.6218 | -1.5314 | yes | yes | yes |
|      |    |                             |                             |                             | SLC7A11 | -0.765  | -0.7579 | -0.9556 | yes | yes | yes |
|      |    |                             |                             |                             | PART1   | -0.6328 | -0.4605 | -0.8708 | yes | yes | yes |
|      |    |                             |                             |                             | AKR1B10 | -0.5828 | -1.0199 | -0.5283 | yes | yes | no  |
|      |    |                             |                             |                             | ABCC2   | -0.3033 | 0.1059  | -0.9073 | no  | no  | yes |
|      |    |                             |                             |                             | GALNT14 | -0.2911 | -1.556  | 0.006   | no  | yes | no  |
|      |    |                             |                             |                             | CYP4F3  | -0.1391 | 0.5664  | -0.7957 | no  | no  | yes |
|      |    |                             |                             |                             | HKDC1   | 0.2159  | 0.3039  | 0.0716  | no  | no  | no  |
|      |    |                             |                             |                             | ACKR3   | 0.7931  | 0.7037  | 1.0838  | no  | no  | yes |
|      |    |                             |                             |                             | ABCA13  | NA      | NA      | NA      | NA  | NA  | no  |
|      |    |                             |                             |                             | ABCA4   | NA      | NA      | NA      | NA  | NA  | no  |
|      |    |                             |                             |                             | ARTN    | NA      | NA      | NA      | NA  | NA  | no  |
|      |    |                             |                             |                             | CYP4F11 | NA      | NA      | NA      | NA  | NA  | no  |
|      |    |                             |                             |                             | FBXW10  | NA      | NA      | NA      | NA  | NA  | no  |
|      |    |                             |                             |                             | PANX2   | NA      | NA      | NA      | NA  | NA  | no  |
|      |    |                             |                             |                             | PTGR1   | NA      | NA      | NA      | NA  | NA  | no  |
|      |    |                             |                             |                             | VSIG10L | NA      | NA      | NA      | NA  | NA  | no  |
|      |    |                             |                             |                             | WNT5A   | NA      | NA      | NA      | NA  | NA  | no  |
|      | 65 | P-value=0.1846 & FDR=0.3592 | P-value=0.2718 & FDR=0.2760 | P-value=0.0809 & FDR=0.1511 | FLRT3   | -0.4733 | -0.0908 | -0.7503 | NA  | NA  | no  |
|      |    |                             |                             |                             | GPRC5C  | 0.0896  | -0.0065 | 0.4883  | NA  | NA  | yes |
|      |    |                             |                             |                             | GSTT1   | 0.1928  | -0.1707 | 0.618   | NA  | NA  | yes |
|      |    |                             |                             |                             | MAOA    | 0.243   | 0.301   | 0.5727  | NA  | NA  | yes |
|      |    |                             |                             |                             | MECOM   | 0.4886  | 0.7462  | 0.2961  | NA  | NA  | yes |
|      |    |                             |                             |                             | GSTM3   | 1.5561  | 1.0332  | 2.554   | NA  | NA  | yes |
|      |    |                             |                             |                             | ABO     | NA      | NA      | NA      | NA  | NA  | no  |
|      |    |                             |                             |                             | ADRB1   | NA      | NA      | NA      | NA  | NA  | no  |
|      |    |                             |                             |                             | BMP7    | NA      | NA      | NA      | NA  | NA  | no  |
|      |    |                             |                             |                             | BTG2    | NA      | NA      | NA      | NA  | NA  | no  |
|      |    |                             |                             |                             | CEL     | NA      | NA      | NA      | NA  | NA  | no  |
|      |    |                             |                             |                             | COLCA1  | NA      | NA      | NA      | NA  | NA  | no  |
|      |    |                             |                             |                             | CYP4X1  | NA      | NA      | NA      | NA  | NA  | no  |
|      |    |                             |                             |                             | FSTL4   | NA      | NA      | NA      | NA  | NA  | no  |
|      |    |                             |                             |                             | GSTM4   | NA      | NA      | NA      | NA  | NA  | no  |
|      |    |                             |                             |                             | HS6ST2  | NA      | NA      | NA      | NA  | NA  | no  |
|      |    |                             |                             |                             | MAPK10  | NA      | NA      | NA      | NA  | NA  | no  |
|      |    |                             |                             |                             | MPPED2  | NA      | NA      | NA      | NA  | NA  | no  |
|      |    |                             |                             |                             | MRAP2   | NA      | NA      | NA      | NA  | NA  | no  |
|      |    |                             |                             |                             | NPAS1   | NA      | NA      | NA      | NA  | NA  | no  |
|      |    |                             |                             |                             | NRG4    | NA      | NA      | NA      | NA  | NA  | no  |
|      |    |                             |                             |                             | PADI3   | NA      | NA      | NA      | NA  | NA  | no  |

|            |        |                             |                             |                             |         |         |                             |                             |                             |       |         |         |         |    |    |    |     |
|------------|--------|-----------------------------|-----------------------------|-----------------------------|---------|---------|-----------------------------|-----------------------------|-----------------------------|-------|---------|---------|---------|----|----|----|-----|
|            |        |                             |                             |                             | PCP4L1  | NA      | NA                          | NA                          | NA                          | NA    | NA      | no      |         |    |    |    |     |
|            |        |                             |                             |                             | RASSF6  | NA      | NA                          | NA                          | NA                          | NA    | NA      | no      |         |    |    |    |     |
|            |        |                             |                             |                             | RGS6    | NA      | NA                          | NA                          | NA                          | NA    | NA      | no      |         |    |    |    |     |
|            |        |                             |                             |                             | SLC52A1 | NA      | NA                          | NA                          | NA                          | NA    | NA      | no      |         |    |    |    |     |
|            |        |                             |                             |                             | UGT1A6  | NA      | NA                          | NA                          | NA                          | NA    | NA      | no      |         |    |    |    |     |
|            |        |                             |                             |                             | UGT1A9  | NA      | NA                          | NA                          | NA                          | NA    | NA      | no      |         |    |    |    |     |
|            |        |                             |                             |                             | WBSCR27 | NA      | NA                          | NA                          | NA                          | NA    | NA      | no      |         |    |    |    |     |
|            |        |                             |                             |                             | ZNF703  | NA      | NA                          | NA                          | NA                          | NA    | NA      | no      |         |    |    |    |     |
| HNSC       | 27     | P-value=0.1176 & FDR=0.1307 | P-value=0.1582 & FDR=0.1784 | P-value=0.0325 & FDR=0.0374 | NQO1    | -3.9077 | -5.05                       | -4.1151                     | yes                         | yes   | yes     | yes     |         |    |    |    |     |
|            |        |                             |                             |                             | AKR1C2  | -1.5429 | -1.397                      | -1.9425                     | yes                         | yes   | yes     | yes     |         |    |    |    |     |
|            |        |                             |                             |                             | AKR1C1  | -1.4129 | -1.2672                     | -1.7733                     | yes                         | yes   | yes     | yes     |         |    |    |    |     |
|            |        |                             |                             |                             | AKR1C3  | -1.0573 | -1.5112                     | -0.8801                     | yes                         | yes   | yes     | yes     |         |    |    |    |     |
|            |        |                             |                             |                             | ME1     | -0.7668 | -1.6032                     | -0.7622                     | yes                         | yes   | yes     | yes     |         |    |    |    |     |
|            |        |                             |                             |                             | SLC7A11 | -0.765  | -0.7579                     | -0.9556                     | yes                         | yes   | yes     | yes     |         |    |    |    |     |
|            |        |                             |                             |                             | AKR1B10 | -0.5828 | -1.0199                     | -0.5283                     | yes                         | yes   | yes     | yes     |         |    |    |    |     |
|            |        |                             |                             |                             | LPCAT1  | -0.4186 | -0.5052                     | -0.7413                     | yes                         | yes   | yes     | yes     |         |    |    |    |     |
|            |        |                             |                             |                             | METAP2  | -0.4097 | 0.1892                      | -0.6109                     | yes                         | no    | yes     | yes     |         |    |    |    |     |
|            |        |                             |                             |                             | CES1    | -0.3253 | 0.527                       | -1.0298                     | yes                         | no    | yes     | yes     |         |    |    |    |     |
|            |        |                             |                             |                             | ABCC2   | -0.3033 | 0.1059                      | -0.9073                     | yes                         | no    | yes     | yes     |         |    |    |    |     |
|            |        |                             |                             |                             | CYP4F3  | -0.1391 | 0.5664                      | -0.7957                     | yes                         | no    | yes     | yes     |         |    |    |    |     |
|            |        |                             |                             |                             | GSTA4   | -0.0927 | -0.5167                     | 0.1488                      | yes                         | yes   | no      | yes     |         |    |    |    |     |
|            |        |                             |                             |                             | TSPAN7  | -0.079  | 0.202                       | -0.3327                     | yes                         | no    | no      | yes     |         |    |    |    |     |
|            |        |                             |                             |                             | RAP1GAP | 0.365   | -0.1657                     | 0.3302                      | no                          | no    | no      | yes     |         |    |    |    |     |
|            |        |                             |                             |                             | GSTM1   | 0.8944  | 0.8134                      | 0.9605                      | no                          | no    | no      | yes     |         |    |    |    |     |
|            |        |                             |                             |                             | GSTM2   | 0.9471  | 0.731                       | 1.0905                      | no                          | no    | no      | yes     |         |    |    |    |     |
|            |        |                             |                             |                             | GSTM3   | 1.5561  | 1.0332                      | 2.554                       | no                          | no    | no      | yes     |         |    |    |    |     |
|            |        |                             |                             |                             | SEPT5   | NA      | NA                          | NA                          | NA                          | NA    | NA      | no      |         |    |    |    |     |
|            |        |                             |                             |                             | CHODL   | NA      | NA                          | NA                          | NA                          | NA    | NA      | no      |         |    |    |    |     |
|            |        |                             |                             |                             | CYP4F11 | NA      | NA                          | NA                          | NA                          | NA    | NA      | no      |         |    |    |    |     |
|            |        |                             |                             |                             | GPAT3   | NA      | NA                          | NA                          | NA                          | NA    | NA      | no      |         |    |    |    |     |
|            |        |                             |                             |                             | GSTM4   | NA      | NA                          | NA                          | NA                          | NA    | NA      | no      |         |    |    |    |     |
|            |        |                             |                             |                             | HHIPL2  | NA      | NA                          | NA                          | NA                          | NA    | NA      | no      |         |    |    |    |     |
|            |        |                             |                             |                             | MAP2    | NA      | NA                          | NA                          | NA                          | NA    | NA      | no      |         |    |    |    |     |
|            |        |                             |                             |                             | OSGIN1  | NA      | NA                          | NA                          | NA                          | NA    | NA      | no      |         |    |    |    |     |
|            |        |                             |                             |                             | PCDHB16 | NA      | NA                          | NA                          | NA                          | NA    | NA      | no      |         |    |    |    |     |
|            |        |                             |                             |                             | SOST    | NA      | NA                          | NA                          | NA                          | NA    | NA      | no      |         |    |    |    |     |
|            |        |                             |                             |                             | HNSC    | 57      | P-value=0.6747 & FDR=0.6836 | P-value=0.7072 & FDR=0.7117 | P-value=0.7390 & FDR=0.7393 | NMB   | -0.7045 | -0.5993 | -0.9201 | NA | NA | NA | yes |
|            |        |                             |                             |                             |         |         |                             |                             |                             | ABCC3 | -0.3173 | -0.7101 | -0.3496 | NA | NA | NA | yes |
|            |        |                             |                             |                             |         |         |                             |                             |                             | MATN2 | -0.1975 | 0.5157  | -0.663  | NA | NA | NA | yes |
| PFN2       | 0.3866 | 0.3465                      | 0.4914                      | NA                          |         |         |                             |                             |                             | NA    | NA      | yes     |         |    |    |    |     |
| ACKR3      | 0.7931 | 0.7037                      | 1.0838                      | NA                          |         |         |                             |                             |                             | NA    | NA      | yes     |         |    |    |    |     |
| GLI2       | 0.8461 | -0.4884                     | 1.9946                      | NA                          |         |         |                             |                             |                             | NA    | NA      | yes     |         |    |    |    |     |
| ADSSL1     | NA     | NA                          | NA                          | NA                          |         |         |                             |                             |                             | NA    | NA      | no      |         |    |    |    |     |
| ARTN       | NA     | NA                          | NA                          | NA                          |         |         |                             |                             |                             | NA    | NA      | no      |         |    |    |    |     |
| B4GALNT1   | NA     | NA                          | NA                          | NA                          |         |         |                             |                             |                             | NA    | NA      | no      |         |    |    |    |     |
| CCL26      | NA     | NA                          | NA                          | NA                          |         |         |                             |                             |                             | NA    | NA      | no      |         |    |    |    |     |
| CHP2       | NA     | NA                          | NA                          | NA                          |         |         |                             |                             |                             | NA    | NA      | no      |         |    |    |    |     |
| CREG2      | NA     | NA                          | NA                          | NA                          |         |         |                             |                             |                             | NA    | NA      | no      |         |    |    |    |     |
| DGKG       | NA     | NA                          | NA                          | NA                          |         |         |                             |                             |                             | NA    | NA      | no      |         |    |    |    |     |
| FER1L6     | NA     | NA                          | NA                          | NA                          |         |         |                             |                             |                             | NA    | NA      | no      |         |    |    |    |     |
| GPNMB      | NA     | NA                          | NA                          | NA                          |         |         |                             |                             |                             | NA    | NA      | no      |         |    |    |    |     |
| HOGA1      | NA     | NA                          | NA                          | NA                          |         |         |                             |                             |                             | NA    | NA      | no      |         |    |    |    |     |
| LMO1       | NA     | NA                          | NA                          | NA                          |         |         |                             |                             |                             | NA    | NA      | no      |         |    |    |    |     |
| NANOS1     | NA     | NA                          | NA                          | NA                          |         |         |                             |                             |                             | NA    | NA      | no      |         |    |    |    |     |
| NAP1L2     | NA     | NA                          | NA                          | NA                          |         |         |                             |                             |                             | NA    | NA      | no      |         |    |    |    |     |
| NDRG4      | NA     | NA                          | NA                          | NA                          |         |         |                             |                             |                             | NA    | NA      | no      |         |    |    |    |     |
| NDUFA4L2   | NA     | NA                          | NA                          | NA                          |         |         |                             |                             |                             | NA    | NA      | no      |         |    |    |    |     |
| NGEF       | NA     | NA                          | NA                          | NA                          |         |         |                             |                             |                             | NA    | NA      | no      |         |    |    |    |     |
| NKX2-8     | NA     | NA                          | NA                          | NA                          |         |         |                             |                             |                             | NA    | NA      | no      |         |    |    |    |     |
| NOS1       | NA     | NA                          | NA                          | NA                          |         |         |                             |                             |                             | NA    | NA      | no      |         |    |    |    |     |
| NRG4       | NA     | NA                          | NA                          | NA                          |         |         |                             |                             |                             | NA    | NA      | no      |         |    |    |    |     |
| PANX2      | NA     | NA                          | NA                          | NA                          |         |         |                             |                             |                             | NA    | NA      | no      |         |    |    |    |     |
| PHEX       | NA     | NA                          | NA                          | NA                          |         |         |                             |                             |                             | NA    | NA      | no      |         |    |    |    |     |
| SLC13A5    | NA     | NA                          | NA                          | NA                          |         |         |                             |                             |                             | NA    | NA      | no      |         |    |    |    |     |
| SLC22A18AS | NA     | NA                          | NA                          | NA                          |         |         |                             |                             |                             | NA    | NA      | no      |         |    |    |    |     |
| STK31      | NA     | NA                          | NA                          | NA                          |         |         |                             |                             |                             | NA    | NA      | no      |         |    |    |    |     |
| WNT9A      | NA     | NA                          | NA                          | NA                          |         |         |                             |                             |                             | NA    | NA      | no      |         |    |    |    |     |
| UCEC       | 97     | P-value=0.0062 &            | P-value=0.0104 &            | P-value=0.0042 &            | NQO1    | -3.9077 | -5.05                       | -4.1151                     | yes                         | yes   | yes     | yes     |         |    |    |    |     |



Supplementary Table 8: Top drivers and enrichment results of the immune response community

## Regulators

|          | M30_BLCA | M58_BLCA | M35_BRCA | M90_COADREAD | M14_GBM | M48_GBM | M17_HNSC | M40_HNSC | M83_HNSC | M84_LAML | M60_LUAD | M85_LUSC | M97_OV | M68_OV | M62_UCEC | # regulated modules |
|----------|----------|----------|----------|--------------|---------|---------|----------|----------|----------|----------|----------|----------|--------|--------|----------|---------------------|
| OAS2     | 1        | 0        | 1        | 0            | 0       | 1       | 0        | 1        | 1        | 1        | 1        | 1        | 0      | 1      | 1        | 10                  |
| TRIM22   | 0        | 0        | 0        | 1            | 1       | 0       | 0        | 1        | 1        | 0        | 0        | 1        | 1      | 0      | 0        | 6                   |
| SP110    | 1        | 1        | 0        | 0            | 0       | 0       | 1        | 0        | 1        | 0        | 0        | 0        | 0      | 0      | 0        | 4                   |
| SP100    | 0        | 1        | 0        | 0            | 0       | 0       | 0        | 0        | 1        | 0        | 1        | 1        | 0      | 0      | 0        | 4                   |
| PSMB8    | 0        | 0        | 1        | 0            | 1       | 1       | 0        | 0        | 0        | 0        | 1        | 0        | 1      | 0      | 0        | 4                   |
| BST2     | 0        | 0        | 0        | 1            | 1       | 1       | 0        | 0        | 0        | 0        | 1        | 0        | 0      | 0      | 0        | 4                   |
| RARRRES3 | 0        | 0        | 0        | 0            | 1       | 1       | 0        | 0        | 0        | 0        | 1        | 0        | 1      | 0      | 0        | 4                   |
| EPS11    | 0        | 0        | 0        | 0            | 0       | 0       | 1        | 1        | 1        | 0        | 0        | 0        | 0      | 0      | 0        | 4                   |
| IRF7     | 1        | 0        | 0        | 0            | 0       | 1       | 0        | 1        | 1        | 0        | 0        | 0        | 0      | 0      | 0        | 4                   |
| PARP9    | 1        | 0        | 0        | 0            | 0       | 0       | 0        | 0        | 0        | 0        | 0        | 0        | 0      | 0      | 1        | 3                   |
| BATF2    | 0        | 0        | 1        | 0            | 0       | 0       | 0        | 0        | 0        | 0        | 0        | 1        | 0      | 1      | 0        | 3                   |
| EIV7     | 0        | 0        | 1        | 0            | 0       | 0       | 0        | 1        | 0        | 0        | 0        | 0        | 0      | 0      | 1        | 3                   |
| MX2      | 0        | 0        | 1        | 0            | 0       | 0       | 0        | 0        | 1        | 0        | 0        | 0        | 0      | 1      | 0        | 3                   |
| OAS1     | 0        | 0        | 1        | 0            | 0       | 0       | 0        | 0        | 0        | 0        | 0        | 0        | 0      | 1      | 1        | 3                   |
| IFI35    | 0        | 0        | 0        | 0            | 0       | 1       | 0        | 0        | 0        | 0        | 0        | 0        | 0      | 1      | 1        | 3                   |
| XAF1     | 0        | 0        | 0        | 0            | 0       | 0       | 0        | 0        | 0        | 0        | 0        | 1        | 0      | 1      | 1        | 3                   |
| HCP5     | 0        | 1        | 1        | 0            | 0       | 0       | 0        | 0        | 0        | 0        | 0        | 0        | 0      | 0      | 0        | 2                   |
| ISG20    | 0        | 0        | 0        | 1            | 0       | 0       | 0        | 0        | 0        | 0        | 0        | 0        | 0      | 1      | 0        | 2                   |
| AIM2     | 0        | 0        | 0        | 1            | 0       | 0       | 1        | 0        | 0        | 0        | 0        | 0        | 0      | 0      | 0        | 2                   |
| TRIM21   | 0        | 0        | 0        | 0            | 1       | 0       | 0        | 1        | 0        | 0        | 0        | 0        | 0      | 0      | 0        | 2                   |
| NMI      | 0        | 0        | 0        | 0            | 1       | 1       | 0        | 0        | 0        | 0        | 0        | 0        | 0      | 0      | 0        | 2                   |
| GBP4     | 0        | 0        | 0        | 0            | 0       | 0       | 0        | 1        | 0        | 0        | 0        | 0        | 1      | 0      | 0        | 2                   |
| SLC15A3  | 0        | 0        | 0        | 0            | 0       | 0       | 0        | 0        | 1        | 0        | 0        | 0        | 0      | 0      | 1        | 2                   |
| IFI6     | 0        | 0        | 0        | 0            | 0       | 0       | 0        | 0        | 0        | 0        | 1        | 1        | 0      | 0      | 0        | 2                   |
| HLA-F    | 0        | 0        | 0        | 0            | 0       | 0       | 0        | 0        | 0        | 1        | 0        | 0        | 0      | 0      | 1        | 2                   |
| CCL5     | 0        | 0        | 0        | 0            | 0       | 0       | 0        | 0        | 0        | 0        | 0        | 1        | 1      | 0      | 0        | 2                   |
| TMEM140  | 0        | 0        | 0        | 0            | 0       | 0       | 0        | 0        | 0        | 0        | 0        | 1        | 1      | 1      | 0        | 2                   |

## Gene enrichment

| Gene set                                       | M30_BLCA | M58_BLCA | M35_BRCA | M90_COADREAD | M14_GBM  | M48_GBM  | M17_HNSC | M40_HNSC | M83_HNSC | M84_LAML | M60_LUAD | M85_LUSC | M97_OV   | M68_OV   | M62_UCEC | # significant enrichments | Averaged p-value |
|------------------------------------------------|----------|----------|----------|--------------|----------|----------|----------|----------|----------|----------|----------|----------|----------|----------|----------|---------------------------|------------------|
| 17823660-TableS1b                              | 7.82E-15 | 3.42E-09 | 6.68E-19 | 3.38E-18     | 5.63E-08 | 8.86E-19 | 1        | 1.15E-05 | 3.01E-16 | 1.53E-03 | 3.85E-09 | 4.05E-14 | 3.21E-02 | 2.18E-26 | 6.43E-18 | 14                        | 2.40E-03         |
| 18245496-SuppTable2                            | 8.52E-17 | 6.78E-08 | 4.33E-20 | 2.08E-14     | 1.10E-13 | 1.01E-18 | 1        | 1.21E-04 | 4.77E-09 | 4.31E-08 | 9.17E-15 | 1.72E-15 | 2.11E-18 | 2.71E-19 | 14       | 8.67E-06                  |                  |
| 12747878-Table2                                | 2.36E-23 | 1.93E-06 | 4.34E-24 | 4.29E-25     | 1.34E-22 | 3.50E-28 | 1        | 6.54E-10 | 4.07E-25 | 2.61E-05 | 5.06E-14 | 1.20E-22 | 3.37E-12 | 7.61E-29 | 3.40E-27 | 14                        | 2.00E-06         |
| FULCHER_INFLAMMATORY_RESPONSE_LECTIN_VS_LPS_DN | 6.89E-20 | 3.64E-03 | 3.48E-19 | 4.21E-23     | 2.36E-07 | 1.65E-30 | 1        | 2.83E-04 | 4.94E-22 | 2.21E-05 | 1.03E-07 | 3.40E-10 | 2.28E-05 | 4.46E-35 | 5.46E-22 | 14                        | 2.83E-04         |
| BROWNE_INTERFERON_RESPONSE_GENES               | 2.20E-26 | 6.52E-16 | 1.16E-25 | 2.76E-31     | 9.21E-27 | 4.00E-29 | 1        | 5.66E-11 | 5.62E-28 | 9.21E-10 | 1.67E-14 | 1.38E-21 | 4.68E-21 | 2.31E-39 | 1.41E-31 | 14                        | 6.98E-11         |
| WALLACE_PROSTATE_CANCER_RACE_UP                | 5.94E-19 | 4.68E-11 | 9.45E-25 | 2.06E-16     | 6.22E-16 | 5.00E-21 | 1        | 9.33E-06 | 5.68E-23 | 2.26E-12 | 3.11E-09 | 1.72E-16 | 2.08E-16 | 4.00E-21 | 6.95E-22 | 14                        | 6.67E-07         |
| GSE10325_CD4_TCELL_VS_L1UPUS_CD4_TCELL_DN      | 4.77E-31 | 2.16E-07 | 3.07E-26 | 2.99E-23     | 1.44E-22 | 1.54E-41 | 1        | 6.63E-09 | 1.04E-33 | 1.20E-04 | 1.70E-15 | 8.35E-24 | 7.41E-11 | 7.65E-51 | 1.09E-31 | 14                        | 8.60E-06         |
| GSE13484_UNSTIM_VS_YF17D_VACCINE_STIM_PBMC_DN  | 1.46E-33 | 1.15E-05 | 2.35E-28 | 3.32E-30     | 1.59E-24 | 2.73E-47 | 1        | 9.84E-11 | 1.60E-36 | 1.20E-04 | 5.25E-13 | 8.35E-24 | 1.26E-17 | 9.02E-61 | 5.71E-34 | 14                        | 9.41E-06         |
| GSE13485_CTRL_VS_DAY3_YF17D_VACCINE_PBMC_DN    | 2.30E-44 | 5.13E-04 | 3.13E-37 | 1.22E-32     | 2.24E-13 | 2.49E-50 | 1        | 1.41E-14 | 1.85E-39 | 3.14E-12 | 3.96E-18 | 1.64E-29 | 7.88E-05 | 5.71E-66 | 1.49E-43 | 14                        | 4.23E-05         |
| GSE13485_CTRL_VS_DAY7_YF17D_VACCINE_PBMC_DN    | 2.74E-47 | 4.64E-11 | 8.99E-47 | 2.52E-40     | 1.61E-26 | 1.63E-53 | 1        | 1.95E-13 | 1.53E-42 | 3.14E-12 | 3.96E-18 | 1.64E-29 | 7.13E-16 | 9.65E-80 | 1.23E-48 | 14                        | 3.54E-12         |
| GSE13485_DAY1_VS_DAY7_YF17D_VACCINE_PBMC_DN    | 2.30E-44 | 5.13E-04 | 5.97E-35 | 1.22E-32     | 1.44E-22 | 2.49E-50 | 1        | 1.59E-18 | 1.60E-36 | 3.24E-10 | 3.96E-18 | 1.40E-26 | 9.73E-08 | 5.71E-66 | 4.35E-41 | 14                        | 3.66E-05         |
| GSE14000_UNSTIM_VS_4H_LPS_DC_TRANSLATED_RNA_DN | 1.34E-28 | 2.16E-07 | 5.97E-35 | 4.77E-21     | 2.14E-08 | 3.80E-36 | 1        | 9.84E-11 | 5.36E-31 | 2.56E-14 | 3.96E-18 | 3.69E-21 | 7.13E-16 | 1.68E-41 | 1.88E-29 | 14                        | 1.70E-08         |
| GSE14000_UNSTIM_VS_4H_LPS_DC_DN                | 3.24E-26 | 2.16E-07 | 5.97E-35 | 4.77E-21     | 2.24E-13 | 1.46E-33 | 1        | 9.84E-11 | 2.23E-28 | 3.14E-12 | 1.70E-15 | 8.35E-24 | 3.69E-14 | 7.65E-51 | 5.71E-34 | 14                        | 1.54E-08         |
| GSE1432_CTRL_VS_IFNG_24H_MICROGLIA_DN          | 3.29E-15 | 5.48E-15 | 2.68E-16 | 8.30E-13     | 7.24E-35 | 1.97E-19 | 1        | 1.41E-14 | 3.11E-12 | 1.20E-04 | 2.83E-06 | 1.92E-07 | 5.93E-27 | 1.44E-22 | 5.54E-17 | 14                        | 8.80E-06         |
| GSE18791_CTRL_VS_NEWCASTLE_VIRUS_DC_6H_DN      | 3.81E-36 | 5.13E-04 | 3.07E-26 | 3.89E-35     | 1.20E-20 | 1.54E-41 | 1        | 1.19E-18 | 5.36E-31 | 1.78E-16 | 5.25E-13 | 3.69E-21 | 1.74E-12 | 9.89E-56 | 1.09E-31 | 14                        | 3.66E-05         |
| GSE18791_CTRL_VS_NEWCASTLE_VIRUS_DC_8H_DN      | 1.46E-33 | 3.43E-09 | 1.64E-30 | 3.89E-35     | 1.27E-30 | 8.38E-39 | 1        | 5.95E-23 | 5.36E-31 | 2.56E-14 | 5.25E-13 | 3.69E-21 | 1.26E-17 | 2.87E-53 | 5.71E-34 | 14                        | 2.45E-10         |
| GSE18791_UNSTIM_VS_NEWCASTLE_VIRUS_DC_6H_DN    | 3.81E-36 | 1.15E-05 | 1.04E-32 | 1.07E-37     | 1.49E-28 | 1.54E-41 | 1        | 5.95E-23 | 5.36E-31 | 2.56E-14 | 5.25E-13 | 3.69E-21 | 7.13E-16 | 9.89E-56 | 2.69E-36 | 14                        | 8.23E-07         |
| GSE18791_UNSTIM_VS_NEWCASTLE_VIRUS_DC_10H_DN   | 1.46E-33 | 2.16E-07 | 3.07E-26 | 1.22E-32     | 1.59E-24 | 3.80E-36 | 1        | 5.95E-23 | 2.23E-28 | 2.81E-08 | 5.25E-13 | 3.69E-21 | 7.13E-16 | 1.87E-48 | 1.88E-29 | 14                        | 1.74E-08         |
| GSE22886_CTRL_VS_LPS_24H_DC_DN                 | 1.46E-33 | 4.64E-11 | 1.64E-30 | 4.77E-21     | 1.59E-24 | 8.38E-39 | 1        | 3.83E-07 | 1.04E-33 | 1.20E-04 | 1.70E-15 | 1.40E-26 | 2.99E-21 | 1.87E-48 | 2.69E-36 | 14                        | 8.61E-06         |
| GSE6269_FLU_VS_STREP_PNEUMO_INF_PBMC_UP        | 4.15E-25 | 1.88E-04 | 2.07E-34 | 1.82E-24     | 3.55E-16 | 9.07E-38 | 1        | 9.92E-08 | 1.12E-29 | 7.22E-09 | 1.12E-13 | 1.58E-19 | 9.66E-12 | 5.43E-39 | 5.49E-31 | 14                        | 1.35E-05         |
| HALLMARK_INTERFERON_GAMMA_RESPONSE             | 1.46E-33 | 4.82E-17 | 1.04E-32 | 7.89E-28     | 7.24E-35 | 3.80E-36 | 1        | 1.41E-14 | 5.36E-31 | 2.81E-08 | 5.25E-13 | 8.35E-24 | 2.99E-21 | 9.89E-56 | 2.69E-36 | 14                        | 2.01E-09         |
| 17823660-TableS1a                              | 8.89E-15 | 6.76E-03 | 1.32E-13 | 3.44E-16     | 3.67E-05 | 1.02E-16 | 1        | 1.01E-02 | 3.42E-16 | 1.62E-03 | 4.16E-09 | 4.52E-14 | 1        | 1.96E-24 | 2.76E-14 | 13                        | 1.43E-03         |
| 18698033-tableS1-STAT1                         | 3.12E-19 | 5.83E-06 | 2.81E-23 | 3.26E-14     | 1.21E-13 | 3.60E-24 | 1        | 9.33E-06 | 1.64E-20 | 1        | 3.06E-08 | 1.28E-14 | 2.05E-07 | 5.35E-22 | 3.26E-17 | 13                        | 4.67E-07         |
| REACTOME_CYTOKINE_SIGNALING_IN_IMMUNE_SYSTEM   | 1.27E-13 | 9.23E-05 | 1.89E-14 | 1.38E-09     | 2.74E-13 | 6.23E-24 | 1        | 1        | 3.80E-19 | 1.64E-05 | 1.72E-05 | 1.93E-08 | 2.52E-12 | 7.81E-24 | 9.75E-21 | 13                        | 9.68E-06         |
| GSE10325_BCCELL_VS_L1UPUS_BCCELL_DN            | 6.81E-24 | 1        | 2.35E-28 | 8.22E-17     | 3.24E-26 | 1        | 1.88E-05 | 2.23E-28 | 1.20E-04 | 3.96E-18 | 3.69E-21 | 2.84E-09 | 9.97E-33 | 5.19E-23 | 13       | 1.07E-05                  |                  |
| GSE10325_MYELOID_VS_L1UPUS_MYELOID_DN          | 6.81E-24 | 1        | 3.83E-20 | 6.69E-19     | 2.24E-13 | 1.46E-33 | 1        | 7.73E-04 | 2.23E-28 | 1.20E-04 | 5.25E-13 | 3.38E-16 | 9.73E-08 | 4.81E-37 | 6.04E-19 | 13                        | 6.87E-05         |
| GSE13485_DAY1_VS_DAY7_YF17D_VACCINE_PBMC_DN    | 2.02E-44 | 1        | 2.76E-37 | 9.54E-38     | 5.83E-17 | 2.17E-50 | 1        | 1.29E-16 | 1.66E-39 | 3.10E-10 | 3.75E-18 | 1.30E-26 | 7.59E-05 | 5.85E-77 | 3.81E-41 | 13                        | 5.84E-06         |
| GSE13485_PRE_VS_POST_YF17D_VACCINATION_PBMC_DN | 2.74E-47 | 1        | 3.13E-37 | 2.52E-40     | 3.95E-15 | 1.63E-53 | 1        | 1.38E-16 | 1.85E-39 | 2.81E-08 | 3.96E-18 | 1.64E-29 | 7.13E-08 | 4.32E-74 | 4.54E-46 | 13                        | 9.64E-09         |
| GSE18791_CTRL_VS_NEWCASTLE_VIRUS_DC_4H_DN      | 1.46E-33 | 1        | 1.04E-32 | 1.22E-32     | 1.15E-11 | 3.80E-36 | 1        | 6.63E-09 | 1.04E-33 | 2.81E-08 | 1.70E-15 | 3.69E-21 | 1.82E-03 | 9.89E-56 | 1.88E-29 | 13                        | 1.40E-04         |
| GSE18791_CTRL_VS_NEWCASTLE_VIRUS_DC_10H_DN     | 6.81E-24 | 2.16E-07 | 3.83E-20 | 2.99E-23     | 1.44E-22 | 6.80E-24 | 1        | 1.41E-14 | 5.15E-21 | 1.20E-04 | 1        | 7.22E-14 | 7.13E-16 | 9.97E-33 | 5.19E-23 | 13                        | 9.26E-06         |
| GSE18791_CTRL_VS_NEWCASTLE_VIRUS_DC_16H_DN     | 6.81E-24 | 1        | 3.83E-20 | 8.22E-17     | 5.25E-10 | 6.80E-24 | 1        | 7.73E-04 | 5.15E-21 | 2.03E-06 | 2.12E-08 | 3.69E-21 | 2.96E-06 | 1.60E-26 | 5.19E-23 | 13                        | 5.99E-05         |
| GSE18791_UNSTIM_VS_NEWCASTLE_VIRUS_DC_18H_DN   | 6.81E-24 | 1        | 3.83E-20 | 4.77E-21     | 2.14E-08 | 1.34E-28 | 1        | 1.26E-12 | 1.04E-18 | 3.14E-12 | 2.12E-08 | 1.24E-11 | 2.96E-06 | 9.97E-33 | 5.19E-23 | 13                        | 2.31E-07         |
| GSE2706_UNSTIM_VS_8H_R848_DC_DN                | 1.98E-19 | 1        | 1.22E-12 | 8.84E-15     | 2.43E-05 | 1.97E-19 | 1        | 3.83E-07 | 1.76E-16 | 2.03E-06 | 2.83E-06 | 1.24E-11 | 3.61E-02 | 1.27E-30 | 4.54E-15 | 13                        | 2.78E-03         |
| GSE34205_RSV_VS_FLU_INF_INFANT_PBMC_DN         | 8.80E-06 | 5.13E-04 | 3.37E-18 | 1.47E-05     | 2.43E-05 | 3.08E-11 | 1        | 7.73E-04 | 3.21E-10 | 1.20E-04 | 1        | 1.70E-05 | 1.82E-03 | 6.25E-17 | 2.15E-11 | 13                        | 2.53E-04         |
| HALLMARK_INTERFERON_ALPHA_RESPONSE             | 1.25E-34 | 6.07E-10 | 3.59E-30 | 1.68E-23     | 4.32E-38 | 1.25E-34 | 1        | 8.67E-12 | 2.35E-28 | 1        | 3.25E-13 | 1.50E-22 | 8.74E-21 | 2.79E-56 | 3.40E-36 | 13                        | 4.74E-11         |
| 16479007-Table3                                | 1.24E-17 | 1        | 6.11E-18 | 6.87E-20     | 9.54E-15 | 8.78E-26 | 1        | 1.22E-18 | 1        | 2.21E-08 | 4.99E-10 | 7.60E-12 | 2.69E-16 | 2.14E-29 | 5.73E-21 | 12                        | 1.89E-09         |
| 18691624-Table1                                | 5.39E-23 | 9.70E-08 | 1.78E-25 | 2.74E-17     | 2.44E-10 | 5.30E-44 | 1        | 1        | 3.10E-30 | 1        | 4.99E-10 | 7.60E-12 | 8.75E-08 | 6.50E-46 | 7.35E-29 | 12                        | 1.54E-08         |
| 16818636-TableS2                               | 4.98E-38 | 1        | 1.17E-27 | 6.10E-32     | 1.12E-03 | 2.10E-49 | 1        | 1.22E-03 | 1.01E-38 | 3.47E-06 | 1.06E-12 | 2.53E-23 | 1        | 1.69E-59 | 1.73E-35 | 12                        | 1.95E-04         |
| 17823660-TableS2                               | 3.15E-09 | 5.57E-06 | 2.98E-11 | 1.9          |          |          |          |          |          |          |          |          |          |          |          |                           |                  |

|                                                              |          |          |          |          |          |          |   |          |          |          |          |          |          |          |          |    |          |
|--------------------------------------------------------------|----------|----------|----------|----------|----------|----------|---|----------|----------|----------|----------|----------|----------|----------|----------|----|----------|
| HECKER_IFNB1_TARGETS                                         | 1.18E-49 | 1        | 7.83E-38 | 4.92E-34 | 8.85E-10 | 1.17E-49 | 1 | 9.13E-10 | 3.27E-37 | 6.53E-11 | 8.07E-22 | 1.07E-31 | 1        | 7.73E-71 | 3.68E-47 | 12 | 1.55E-10 |
| GSE13485_DAY7_VS_DAY21_YF17D_VACCINE_PBMC_UP                 | 3.24E-26 | 1        | 3.07E-26 | 2.99E-23 | 6.62E-04 | 1.46E-33 | 1 | 7.73E-04 | 7.60E-26 | 2.03E-06 | 5.25E-13 | 1.26E-18 | 1        | 9.89E-56 | 4.11E-25 | 12 | 1.20E-04 |
| GSE14000_UNSTIM_VS_16H_LPS_DC_TRANSLATED_RNA_DN              | 3.43E-13 | 1        | 1.22E-12 | 6.76E-11 | 1.54E-02 | 1.97E-19 | 1 | 1        | 1.04E-18 | 2.81E-08 | 2.83E-06 | 1.92E-07 | 7.88E-05 | 1.44E-22 | 3.31E-13 | 12 | 1.29E-03 |
| GSE1432_CTRL_VS_IFNG_6H_MICROGLIA_DN                         | 1.58E-07 | 4.64E-11 | 6.96E-11 | 2.87E-07 | 1.49E-28 | 3.42E-13 | 1 | 9.84E-11 | 2.78E-08 | 1.20E-04 | 1        | 1        | 5.93E-27 | 6.25E-17 | 6.12E-08 | 12 | 1.01E-05 |
| GSE17974_IL4_AND_ANTI_IL12_VS_UNTREATED_24H_ACT_CD4_TCELL_DN | 4.77E-31 | 1        | 3.83E-20 | 4.77E-21 | 1.54E-02 | 4.76E-31 | 1 | 7.73E-04 | 2.23E-28 | 2.03E-06 | 1.21E-10 | 1.26E-18 | 1        | 2.96E-39 | 2.93E-27 | 12 | 1.34E-03 |
| GSE24634_IL4_VS_CTRL_TREATED_NAIVE_CD4_TCELL_DAYS_DN         | 3.43E-13 | 2.16E-07 | 2.68E-16 | 8.22E-17 | 1.15E-11 | 2.73E-17 | 1 | 1        | 5.15E-21 | 1.20E-04 | 1        | 1.72E-09 | 9.73E-08 | 9.05E-19 | 4.54E-15 | 12 | 1.00E-05 |
| GSE2706_UNSTIM_VS_2H_LPS_AND_R848_DC_DN                      | 3.29E-15 | 1        | 6.96E-11 | 6.76E-11 | 6.62E-04 | 3.08E-11 | 1 | 1.88E-05 | 3.21E-10 | 1        | 2.12E-08 | 1.24E-11 | 2.96E-06 | 2.23E-13 | 4.54E-15 | 12 | 5.70E-05 |
| GSE34205_HEALTHY_VS_FLU_INF_INFANT_PBMC_DN                   | 6.81E-24 | 1        | 2.35E-28 | 6.69E-19 | 6.62E-04 | 1.34E-28 | 1 | 7.77E-04 | 2.23E-28 | 1.20E-04 | 1.21E-10 | 1.26E-18 | 1        | 4.81E-37 | 5.19E-23 | 12 | 1.30E-04 |
| 15735721-SuppTable1b                                         | 2.84E-26 | 1        | 2.07E-20 | 1.55E-16 | 1.79E-06 | 2.50E-39 | 1 | 1        | 3.14E-28 | 1        | 8.37E-12 | 8.24E-18 | 5.89E-06 | 1.32E-50 | 2.51E-23 | 11 | 6.98E-07 |
| REACTOME_INTERFERON_ALPHA_BETA_SIGNALING                     | 7.11E-19 | 1        | 3.26E-21 | 5.00E-16 | 2.34E-09 | 1.44E-29 | 1 | 1        | 1.62E-25 | 1        | 2.66E-09 | 1.44E-13 | 6.18E-07 | 3.23E-32 | 7.35E-27 | 11 | 5.66E-08 |
| DER_IFN_ALPHA_RESPONSE_UP                                    | 1.07E-15 | 1        | 4.99E-18 | 3.43E-20 | 3.10E-19 | 1.26E-20 | 1 | 1        | 2.89E-19 | 1        | 6.56E-09 | 4.90E-13 | 3.22E-16 | 4.17E-26 | 1.33E-18 | 11 | 5.97E-10 |
| DER_IFN_BETA_RESPONSE_UP                                     | 1.67E-16 | 1        | 2.99E-16 | 9.22E-21 | 2.68E-17 | 3.04E-21 | 1 | 1        | 4.05E-20 | 1        | 4.74E-08 | 7.06E-12 | 1.90E-14 | 6.99E-26 | 5.23E-19 | 11 | 4.31E-09 |
| SANA_TNF_SIGNALING_UP                                        | 7.19E-13 | 1        | 4.11E-07 | 7.92E-15 | 2.70E-12 | 1.22E-10 | 1 | 3.87E-06 | 2.11E-11 | 1        | 1        | 8.15E-08 | 4.00E-06 | 1.54E-18 | 5.83E-18 | 11 | 7.61E-07 |
| HELLER_SILENCED_BY_METHYLATION_UP                            | 1.56E-11 | 3.89E-03 | 3.30E-06 | 1.58E-04 | 1        | 2.56E-15 | 1 | 1        | 1.17E-12 | 1        | 2.23E-05 | 2.73E-08 | 2.85E-06 | 1.15E-14 | 1.31E-06 | 11 | 3.71E-04 |
| MOSERLE_IFNA_RESPONSE                                        | 1.58E-45 | 1        | 7.10E-29 | 1.07E-34 | 1        | 5.02E-42 | 1 | 6.21E-14 | 1.22E-33 | 4.37E-15 | 2.54E-14 | 1.49E-22 | 1        | 1.51E-42 | 8.54E-39 | 11 | 8.35E-15 |
| GSE1432_1H_VS_6H_IFNG_MICROGLIA_DN                           | 1.58E-07 | 1.15E-05 | 5.98E-06 | 2.87E-07 | 1.20E-20 | 1.58E-07 | 1 | 6.63E-09 | 1.19E-04 | 1        | 1        | 1        | 2.02E-19 | 5.21E-10 | 9.85E-05 | 11 | 2.14E-05 |
| GSE18791_CTRL_VS_NEWCASTLE_VIRUS_DC_12H_DN                   | 1.98E-19 | 1        | 1.22E-12 | 8.30E-13 | 6.29E-17 | 1.97E-19 | 1 | 9.84E-11 | 3.11E-12 | 1        | 1        | 1.72E-09 | 7.41E-11 | 1.60E-26 | 5.54E-17 | 11 | 1.73E-10 |
| GSE2706_R848_VS_R848_AND_LPS_2H_STIM_DC_DN                   | 3.09E-11 | 1.15E-05 | 3.50E-09 | 2.87E-07 | 1.54E-02 | 3.28E-15 | 1 | 1        | 2.55E-14 | 1        | 1        | 1.92E-07 | 1.82E-03 | 3.92E-15 | 6.12E-08 | 11 | 1.56E-03 |
| GSE3982_CTRL_VS_LPS_48H_DC_DN                                | 3.43E-13 | 5.13E-04 | 1.91E-14 | 4.76E-09 | 1        | 1.24E-21 | 1 | 1        | 1.76E-16 | 2.03E-06 | 1.21E-10 | 1.24E-11 | 1        | 9.05E-19 | 4.54E-15 | 11 | 4.68E-05 |
| 15735721-Table3                                              | 1.40E-18 | 1        | 5.45E-16 | 1.13E-13 | 1        | 6.68E-26 | 1 | 1        | 7.42E-20 | 1        | 2.47E-10 | 1.05E-11 | 9.21E-04 | 2.62E-32 | 1.46E-16 | 10 | 9.21E-05 |
| 19014521-TableS6b                                            | 8.92E-05 | 1.12E-04 | 2.68E-10 | 4.69E-10 | 3.10E-11 | 2.03E-08 | 1 | 1        | 3.34E-07 | 1        | 1        | 1        | 1.70E-10 | 7.76E-08 | 1.25E-12 | 10 | 2.02E-05 |
| 16818636-TableS3                                             | 1.16E-21 | 1        | 1.29E-17 | 2.23E-13 | 1        | 7.84E-33 | 1 | 1        | 3.76E-26 | 3.40E-06 | 1.54E-08 | 2.76E-13 | 1        | 2.25E-28 | 2.65E-20 | 10 | 3.42E-07 |
| TAKEDA_TARGETS_OF_NUP98_HOXA9_FUSION_8D_UP                   | 4.41E-28 | 1        | 5.45E-24 | 3.24E-18 | 1        | 2.92E-41 | 1 | 1        | 5.54E-33 | 3.70E-07 | 1.69E-11 | 2.20E-17 | 1        | 1.49E-37 | 4.34E-27 | 10 | 3.70E-08 |
| GRAESSMANN_RESPONSE_TO_MC_AND_SERUM_DEPRIVATION_UP           | 4.27E-19 | 1        | 1.26E-10 | 1.70E-14 | 9.54E-04 | 5.56E-17 | 1 | 1        | 2.11E-18 | 1        | 3.91E-06 | 1.24E-13 | 1        | 4.87E-26 | 3.89E-11 | 10 | 9.58E-05 |
| SEITZ_NEOPLASTIC_TRANSFORMATION_BY_8P_DELETION_UP            | 6.59E-26 | 1        | 4.19E-18 | 8.65E-23 | 1        | 2.24E-31 | 1 | 1        | 1.68E-27 | 2.66E-07 | 1.56E-11 | 1.06E-15 | 1        | 4.89E-31 | 1.93E-23 | 10 | 2.66E-08 |
| RADAEVA_RESPONSE_TO_IFNA1_UP                                 | 5.82E-20 | 1        | 1.26E-17 | 1.42E-19 | 4.05E-10 | 3.18E-28 | 1 | 1        | 6.32E-24 | 1        | 1.71E-15 | 2.46E-14 | 1        | 6.59E-29 | 3.83E-18 | 10 | 4.05E-11 |
| JISON_SICKLE_CELL_DISEASE_UP                                 | 9.67E-10 | 1        | 1.29E-09 | 1.93E-09 | 3.34E-04 | 9.65E-10 | 1 | 1        | 1.25E-08 | 1        | 1        | 9.36E-06 | 3.60E-05 | 1.73E-10 | 7.07E-12 | 10 | 3.80E-05 |
| LTE2_UP_V1_DN                                                | 8.41E-22 | 1        | 2.52E-20 | 5.24E-11 | 1.33E-02 | 2.88E-31 | 1 | 1        | 1.46E-23 | 1        | 1.77E-08 | 9.22E-19 | 1        | 2.46E-37 | 3.89E-21 | 10 | 1.33E-03 |
| GSE1432_1H_VS_24H_IFNG_MICROGLIA_DN                          | 4.08E-04 | 5.42E-13 | 1.98E-04 | 1.47E-05 | 1.61E-26 | 4.08E-04 | 1 | 9.84E-11 | 1        | 1        | 1        | 1        | 4.07E-23 | 7.65E-07 | 3.09E-03 | 10 | 4.12E-04 |
| GSE18791_CTRL_VS_NEWCASTLE_VIRUS_DC_14H_DN                   | 3.43E-13 | 1        | 6.96E-11 | 8.30E-13 | 2.43E-05 | 3.28E-15 | 1 | 1        | 2.55E-14 | 1        | 1        | 1.72E-09 | 1.82E-03 | 9.05E-19 | 3.31E-13 | 10 | 1.85E-04 |
| GSE24634_IL4_VS_CTRL_TREATED_NAIVE_CD4_TCELL_DAY3_DN         | 1        | 3.43E-09 | 1.98E-04 | 1.47E-05 | 9.11E-19 | 1.58E-07 | 1 | 6.63E-09 | 1.19E-04 | 1        | 1        | 1        | 3.69E-14 | 5.21E-10 | 3.09E-03 | 10 | 3.42E-04 |
| GSE2706_2H_VS_8H_R848_STIM_DC_DN                             | 3.43E-13 | 1        | 5.98E-06 | 6.76E-11 | 7.71E-07 | 1.58E-07 | 1 | 7.77E-04 | 2.78E-08 | 1        | 1        | 1.92E-07 | 1        | 1.19E-20 | 1.22E-09 | 10 | 7.80E-05 |
| GSE6269_HEALTHY_VS_FLU_INF_PBMC_DN                           | 1.39E-18 | 1        | 3.64E-28 | 4.18E-18 | 1        | 5.53E-33 | 1 | 1        | 4.22E-30 | 3.16E-05 | 1.73E-16 | 2.72E-17 | 1        | 4.33E-35 | 1.01E-24 | 10 | 3.16E-06 |

Supplementary Table 9: Correlation results between OAS2 expression and PDL1, PDL2 expression

|          | PDL1              |                 | PDL2              |                 |
|----------|-------------------|-----------------|-------------------|-----------------|
|          | Correlation       | p-value         | Correlation       | p-value         |
| BLCA     | <b>0.37986076</b> | <b>1.33E-07</b> | <b>0.47881211</b> | <b>9.23E-12</b> |
| BRCA     | <b>0.50650067</b> | <b>2.64E-65</b> | <b>0.50711491</b> | <b>1.75E-65</b> |
| COADREAD | <b>0.60207578</b> | <b>2.25E-59</b> | <b>0.57225802</b> | <b>1.55E-52</b> |
| GBM      | <b>0.2443322</b>  | <b>3.03E-08</b> | <b>0.44456103</b> | <b>1.10E-25</b> |
| HNSC     | <b>0.46167336</b> | <b>5.53E-21</b> | <b>0.58763591</b> | <b>8.03E-36</b> |
| LAML     | <b>0.35092034</b> | <b>2.21E-06</b> | <b>0.47037297</b> | <b>6.58E-11</b> |
| LUAD     | <b>0.46354703</b> | <b>2.02E-27</b> | <b>0.50251799</b> | <b>1.19E-32</b> |
| LUSC     | <b>0.3021614</b>  | <b>8.38E-12</b> | <b>0.41479729</b> | <b>8.47E-22</b> |
| OV       | <b>0.48596421</b> | <b>2.07E-33</b> | <b>0.42196289</b> | <b>9.07E-25</b> |
| UCEC     | <b>0.46365178</b> | <b>1.93E-28</b> | <b>0.39655769</b> | <b>1.40E-20</b> |

Supplementary Table 10: Top drivers and enrichment results of the cell community

**Regulators**

|           | M31_BLCA | M13_BRCA | M26_COADREAD | M33_GBM | M80_HNSC | M87_KIRC | M93_LAML | M51_LUAD | M84_LUSC | M39_OV | M10_UCEC |
|-----------|----------|----------|--------------|---------|----------|----------|----------|----------|----------|--------|----------|
| HIST1H2AE | 1        | 1        | 1            | 0       | 0        | 0        | 0        | 1        | 1        | 0      | 1        |
| HIST1H3G  | 1        | 0        | 1            | 0       | 1        | 0        | 0        | 0        | 0        | 0      | 0        |
| HIST1H2BJ | 0        | 1        | 0            | 0       | 0        | 0        | 0        | 1        | 1        | 0      | 0        |
| HIST1H3H  | 0        | 1        | 0            | 0       | 0        | 1        | 0        | 0        | 1        | 0      | 0        |
| ENSA      | 0        | 1        | 0            | 0       | 0        | 0        | 0        | 0        | 1        | 0      | 0        |
| HIST1H1D  | 0        | 1        | 0            | 0       | 0        | 0        | 0        | 0        | 1        | 0      | 0        |
| HIST1H3D  | 0        | 1        | 0            | 0       | 0        | 0        | 0        | 1        | 0        | 0      | 0        |
| FIG4      | 0        | 0        | 0            | 0       | 0        | 1        | 0        | 1        | 0        | 0      | 0        |

**Gene enrichment**

| Gene sets                                         | M31_BLCA | M13_BRCA | M26_COADREAD | M33_GBM  | M80_HNSC | M87_KIRC | M93_LAML | M51_LUAD | M84_LUSC | M39_OV   | M10_UCEC | # significant enrichments | Averaged p-value |
|---------------------------------------------------|----------|----------|--------------|----------|----------|----------|----------|----------|----------|----------|----------|---------------------------|------------------|
| KEGG_SYSTEMIC_LUPUS_ERYTHEMATOSUS                 | 6.76E-33 | 8.12E-54 | 1.04E-26     | 1.74E-21 | 5.51E-16 | 3.78E-25 | 3.75E-34 | 4.18E-32 | 5.28E-29 | 1.19E-46 | 8.83E-30 | 11                        | 2.40E-03         |
| REACTOME_MEIOSIS                                  | 2.24E-31 | 6.04E-41 | 6.53E-25     | 1.53E-17 | 9.61E-17 | 8.63E-15 | 7.11E-23 | 2.90E-27 | 7.01E-19 | 1.20E-33 | 4.46E-31 | 11                        | 8.67E-06         |
| REACTOME_CELL_CYCLE                               | 1.44E-11 | 3.09E-20 | 5.32E-09     | 2.84E-11 | 3.91E-05 | 4.03E-04 | 1.27E-09 | 1.32E-10 | 6.74E-07 | 3.30E-20 | 5.31E-13 | 11                        | 2.00E-06         |
| REACTOME_RNA_POL_I_TRANSCRIPTION                  | 2.29E-33 | 1.23E-43 | 1.67E-26     | 2.47E-16 | 8.02E-18 | 7.23E-16 | 1.36E-24 | 5.50E-29 | 3.27E-20 | 3.46E-36 | 6.19E-33 | 11                        | 2.83E-04         |
| REACTOME_TRANSCRIPTION                            | 4.83E-27 | 3.72E-35 | 1.99E-21     | 1.72E-12 | 2.30E-14 | 2.05E-12 | 4.01E-19 | 1.69E-23 | 5.87E-16 | 3.58E-28 | 5.02E-27 | 11                        | 6.98E-11         |
| REACTOME_RNA_POL_I_RNA_POL_III_AND_MITOCHONDRIAL_ | 5.31E-31 | 1.92E-40 | 1.30E-24     | 6.62E-15 | 1.54E-16 | 1.38E-14 | 1.50E-22 | 6.13E-27 | 1.25E-18 | 3.60E-33 | 9.96E-31 | 11                        | 6.67E-07         |
| REACTOME_CHROMOSOME_MAINTENANCE                   | 1.37E-17 | 1.08E-29 | 6.65E-14     | 2.73E-17 | 2.21E-08 | 2.36E-07 | 1.31E-15 | 4.54E-16 | 3.10E-11 | 8.62E-31 | 4.87E-19 | 11                        | 8.60E-06         |
| REACTOME_DEPOSITION_OF_NEW_CENPA_CONTAINING_NUCL  | 7.39E-21 | 5.96E-35 | 1.52E-16     | 7.44E-18 | 4.14E-10 | 4.45E-09 | 7.15E-19 | 5.07E-19 | 1.45E-13 | 9.59E-37 | 2.61E-22 | 11                        | 9.41E-06         |
| REACTOME_RNA_POL_I_PROMOTER_OPENING               | 3.56E-36 | 1.76E-47 | 9.93E-29     | 5.29E-18 | 2.57E-19 | 2.32E-17 | 5.24E-27 | 2.10E-31 | 4.58E-22 | 8.20E-40 | 1.51E-35 | 11                        | 4.23E-05         |
| REACTOME_MEIOTIC_RECOMBINATION                    | 1.25E-33 | 5.45E-44 | 1.04E-26     | 4.82E-19 | 5.81E-18 | 5.23E-16 | 8.08E-25 | 3.27E-29 | 2.19E-20 | 1.60E-36 | 3.53E-33 | 11                        | 3.54E-12         |
| REACTOME_MEIOTIC_SYNOPSIS                         | 3.53E-20 | 7.61E-34 | 5.36E-16     | 3.04E-17 | 9.39E-10 | 1.01E-08 | 3.41E-18 | 2.07E-18 | 4.40E-13 | 1.74E-35 | 1.25E-21 | 11                        | 3.66E-05         |
| REACTOME_AMYLOIDS                                 | 6.71E-34 | 2.33E-44 | 6.30E-27     | 1.19E-16 | 4.15E-18 | 3.74E-16 | 4.72E-25 | 1.91E-29 | 1.45E-20 | 7.17E-37 | 1.97E-33 | 11                        | 1.70E-08         |
| REACTOME_PACKAGING_OF_TELOMERE_ENDS               | 2.26E-22 | 1.85E-37 | 9.31E-18     | 3.23E-19 | 6.79E-11 | 7.32E-10 | 2.19E-20 | 1.50E-22 | 1.24E-14 | 1.29E-39 | 7.95E-24 | 11                        | 1.54E-08         |
| REACTOME_TELOMERE_MAINTENANCE                     | 4.85E-20 | 1.28E-33 | 6.93E-16     | 9.69E-20 | 1.11E-09 | 1.19E-08 | 4.68E-18 | 2.77E-18 | 5.51E-13 | 3.13E-35 | 1.72E-21 | 11                        | 8.80E-06         |
| ACEVEDO_LIVER_CANCER_WITH_H3K27ME3_DN             | 1.74E-06 | 1.27E-22 | 2.99E-07     | 4.11E-10 | 9.84E-07 | 1.00E-07 | 1.49E-12 | 4.99E-09 | 4.99E-09 | 1.20E-15 | 1.23E-13 | 11                        | 3.66E-05         |
| 18172295-SuppTable3                               | 3.38E-08 | 1.99E-11 | 1.36E-05     | 1.13E-04 | 1        | 6.19E-10 | 2.74E-08 | 6.48E-13 | 6.48E-13 | 9.33E-11 | 1.36E-05 | 10                        | 2.45E-10         |
| HELLER_HDAC_TARGETS_SILENCED_BY_METHYLATION_UP    | 2.54E-09 | 5.06E-14 | 4.04E-05     | 9.58E-06 | 1        | 2.35E-11 | 3.42E-09 | 3.28E-14 | 3.67E-12 | 2.27E-11 | 1.20E-08 | 10                        | 8.23E-07         |
| 18798265-tableS2                                  | 3.91E-10 | 8.35E-15 | 1.23E-06     | 1        | 1        | 2.87E-09 | 4.50E-05 | 8.50E-11 | 1.40E-08 | 6.44E-11 | 4.74E-11 | 9                         | 1.74E-08         |
| HELLER_HDAC_TARGETS_UP                            | 1.73E-05 | 8.91E-11 | 3.00E-06     | 1        | 1        | 1.06E-08 | 6.22E-06 | 7.68E-12 | 8.18E-10 | 2.29E-10 | 1.81E-04 | 9                         | 8.61E-06         |
| 18172295-SuppTable2                               | 2.83E-04 | 8.81E-10 | 1            | 1        | 1        | 3.12E-07 | 6.79E-05 | 1.79E-10 | 1.79E-10 | 1.33E-09 | 1        | 8                         | 1.35E-05         |
| 15489886-TableS1a                                 | 1.47E-03 | 2.99E-10 | 1            | 1        | 1        | 1.44E-04 | 4.59E-04 | 2.21E-09 | 1.05E-05 | 7.83E-07 | 3.49E-04 | 8                         | 2.01E-09         |
| GEORGANTAS_HSC_MARKERS                            | 1.61E-12 | 1.03E-15 | 1            | 1        | 1        | 8.49E-09 | 1.66E-13 | 8.20E-16 | 1.17E-10 | 9.07E-12 | 4.11E-16 | 8                         | 1.43E-03         |
| EGFR_UPV1_DN                                      | 4.12E-05 | 3.41E-11 | 1            | 9.69E-09 | 1        | 3.93E-06 | 1        | 1.56E-07 | 1.43E-05 | 9.14E-15 | 9.61E-06 | 8                         | 4.67E-07         |
| MEK_UPV1_DN                                       | 4.25E-05 | 2.71E-09 | 1            | 5.81E-05 | 1        | 4.05E-06 | 1        | 1.48E-05 | 1.48E-05 | 4.00E-11 | 9.91E-06 | 8                         | 9.68E-06         |
| STK33_SKM_UP                                      | 7.86E-06 | 2.56E-11 | 1            | 1        | 1        | 4.57E-07 | 5.51E-08 | 2.45E-12 | 2.93E-10 | 8.69E-08 | 9.22E-05 | 8                         | 1.07E-05         |
| HADDAD_B_LYMPHOCYTE_PROGENITOR                    | 4.81E-04 | 1.06E-07 | 1            | 1.46E-05 | 1        | 1        | 1.26E-04 | 3.74E-08 | 1.69E-04 | 3.52E-09 | 1        | 7                         | 6.87E-05         |
| 16109776-TableS1                                  | 5.12E-03 | 4.99E-02 | 1            | 1        | 1        | 1        | 4.05E-02 | 1.82E-03 | 1.82E-03 | 1        | 1        | 5                         | 5.84E-06         |
| 18757322-TableS3                                  | 1        | 1.16E-05 | 1            | 1        | 1        | 1        | 1        | 4.72E-08 | 1.11E-04 | 5.83E-03 | 1        | 4                         | 9.64E-09         |
| 19429869-TableS1                                  | 1        | 2.43E-05 | 1            | 1.45E-06 | 1        | 1        | 1        | 6.01E-04 | 1        | 1.00E-06 | 1        | 4                         | 1.40E-04         |
| 15459216-TableA2e                                 | 1        | 6.43E-22 | 1            | 1        | 1        | 1        | 7.57E-14 | 6.01E-13 | 1        | 2.66E-17 | 1        | 4                         | 9.26E-06         |
| DEURIG_T_CELL_PROLYMPHOCYTIC_LEUKEMIA_UP          | 1        | 7.85E-04 | 1            | 2.55E-03 | 1        | 1        | 1.51E-02 | 1        | 1        | 2.83E-05 | 1        | 4                         | 5.99E-05         |
| GSE13411_PLASMA_CELL_VS_MEMORY_BCELL_UP           | 1        | 1.15E-05 | 1            | 6.76E-05 | 1        | 1        | 1.60E-07 | 1        | 1        | 1.25E-07 | 1        | 4                         | 2.31E-07         |
| GSE29618_MONOCYTE_VS_MDC_DN                       | 1        | 1.15E-05 | 1            | 1.24E-08 | 1        | 1        | 4.14E-04 | 1        | 1        | 1.25E-07 | 1        | 4                         | 2.78E-03         |
| 18362358-Table10                                  | 1        | 9.58E-04 | 1            | 8.78E-05 | 1        | 1        | 1        | 1        | 1        | 3.66E-05 | 1        | 3                         | 2.53E-04         |
| 18487511-TableS1                                  | 1        | 5.47E-06 | 1            | 2.62E-11 | 1        | 1        | 1        | 1        | 1        | 1.23E-12 | 1        | 3                         | 4.74E-11         |
| 17823660-TableS2                                  | 1        | 1.49E-04 | 1            | 1        | 1        | 1        | 1        | 2.36E-03 | 1        | 4.51E-02 | 1        | 3                         | 1.89E-09         |
| GAZDA_DIAMOND_BLACKFAN_ANEMIA_ERYTHROID_DN        | 1        | 5.55E-03 | 1            | 5.23E-04 | 1        | 1        | 1        | 1        | 1        | 5.40E-03 | 1        | 3                         | 1.54E-08         |
| DAZARD_RESPONSE_TO_UV_NHEK_UP                     | 1        | 1        | 1            | 2.21E-04 | 1        | 1        | 1.34E-03 | 1        | 1        | 6.63E-04 | 1        | 3                         | 1.95E-04         |
| ACEVEDO_LIVER_CANCER_WITH_H3K9ME3_DN              | 1        | 1.70E-15 | 1            | 1        | 1        | 1        | 2.44E-07 | 1        | 1        | 8.24E-08 | 1        | 3                         | 2.50E-05         |
| GSE29618_MONOCYTE_VS_MDC_DAY7_FLU_VACCINE_DN      | 1        | 1.15E-05 | 1            | 6.76E-05 | 1        | 1        | 1        | 1        | 1        | 1.25E-07 | 1        | 3                         | 9.27E-08         |
| GSE29618_LAIV_VS_TIV_FLU_VACCINE_DAY7_PDC_DN      | 1        | 1.15E-05 | 1            | 6.76E-05 | 1        | 1        | 1        | 1        | 1        | 1.25E-07 | 1        | 3                         | 7.77E-04         |
| 19181379-Table2                                   | 1        | 3.84E-10 | 1            | 1        | 1        | 1        | 1        | 1        | 1        | 1.05E-11 | 1        | 2                         | 1.13E-03         |
| 16434974-Table1                                   | 1        | 1        | 1            | 5.06E-06 | 1        | 1        | 1        | 1        | 1        | 8.45E-06 | 1        | 2                         | 4.00E-03         |
| 16909110-Table1                                   | 1        | 2.04E-06 | 1            | 1        | 1        | 1        | 1        | 6.54E-08 | 1        | 1        | 1        | 2                         | 2.21E-09         |
| OLSSON_E2F3_TARGETS_DN                            | 1        | 9.69E-08 | 1            | 1        | 1        | 1        | 1        | 3.08E-09 | 1        | 1        | 1        | 2                         | 1.55E-10         |
| KOBAYASHI_EGFR_SIGNALING_24HR_UP                  | 1        | 8.47E-06 | 1            | 1        | 1        | 1        | 1        | 1        | 1        | 2.02E-08 | 1        | 2                         | 1.20E-04         |
| GSE12845_IJD_POS_VS_NEG_BLOOD_BCELL_UP            | 1        | 1.15E-05 | 1            | 1        | 1        | 1        | 1        | 1        | 1        | 1.25E-07 | 1        | 2                         | 1.29E-03         |
| GSE12845_IJD_POS_BLOOD_VS_NAIVE_TONSIL_BCELL_UP   | 1        | 1.15E-05 | 1            | 1        | 1        | 1        | 1        | 1        | 1        | 1.69E-04 | 1        | 2                         | 1.01E-05         |
| GSE22886_CTRL_VS_LPS_24H_DC_DN                    | 1        | 1.15E-05 | 1            | 1        | 1        | 1        | 1        | 1        | 1        | 4.96E-06 | 1        | 2                         | 1.34E-03         |
